# Supplementary material
Source: publisher figshare collection journal article supplement (https://gsajournals.figshare.com/ndownloader/files/23153600)
Supplement: Supplementary file 1 [file 23153600]

## Sheet: Table_S6_MisregulatedGenes
Table S6: Misregulated genes in ∆hH2Az
	baseMean	log2 FoldChange	lfcSE	stat	pvalue	padj
gene9454	1512.69	-5.7645	0.321283	-16.1369	1.4e-58	1.28e-54
gene4284	900.288	4.78799	0.285616	14.733	3.96e-49	1.8e-45
gene7384	17920.4	3.04626	0.170154	14.4943	1.32e-47	3.99e-44
gene2632	548.966	3.71672	0.224907	13.9468	3.29e-44	7.49e-41
gene7465	3545.96	-8.40796	0.567317	-13.7982	2.61e-43	4.76e-40
gene1333	11052.5	2.85457	0.169861	13.3907	6.85e-41	1.04e-37
gene9455	1527.89	-4.54024	0.297288	-13.3212	1.74e-40	2.27e-37
gene6676	2310.4	3.031	0.185469	13.2152	7.17e-40	8.16e-37
gene860	792.266	4.51285	0.303919	12.9405	2.66e-38	2.69e-35
gene9151	337.547	4.73934	0.336797	12.3497	4.89e-35	4.45e-32
gene9167	693.711	5.15952	0.37334	12.2664	1.37e-34	1.14e-31
gene784	3490.3	3.09396	0.20966	11.9906	3.98e-33	3.02e-30
gene2585	1569.06	-3.87984	0.27563	-11.972	4.98e-33	3.49e-30
gene3653	3406.22	3.8377	0.275381	11.8298	2.74e-32	1.78e-29
gene5938	440.619	-3.2052	0.223798	-11.7302	8.92e-32	5.41e-29
gene6450	4841.6	3.05279	0.214969	11.503	1.27e-30	7.25e-28
gene10395	441.943	-2.73451	0.187399	-11.4969	1.37e-30	7.32e-28
gene2163	647.484	3.19727	0.23402	11.184	4.89e-29	2.47e-26
gene10024	3778.28	3.27808	0.244295	11.0444	2.33e-28	1.12e-25
gene7488	129.205	-4.03878	0.31729	-10.901	1.14e-27	5.19e-25
gene1284	22097.9	2.93093	0.218017	10.7832	4.13e-27	1.79e-24
gene1812	274.267	5.36859	0.445165	10.7569	5.5e-27	2.28e-24
gene4702	255.927	3.74619	0.296776	10.6686	1.43e-26	5.65e-24
gene3415	337.571	-3.33663	0.261474	-10.5426	5.49e-26	2.08e-23
gene5653	3398.95	2.96108	0.22936	10.3814	3.01e-25	1.1e-22
gene9259	451.959	-4.95902	0.422919	-10.3543	4e-25	1.35e-22
gene5533	1125.27	2.60924	0.195964	10.3552	3.96e-25	1.35e-22
gene1015	758.537	-2.61622	0.197863	-10.2911	7.73e-25	2.51e-22
gene1570	312.797	2.99429	0.235406	10.2559	1.11e-24	3.5e-22
gene4973	330.415	5.45539	0.480862	10.1389	3.71e-24	1.13e-21
gene5257	550.598	4.2578	0.365918	10.0509	9.11e-24	2.67e-21
gene5534	18786.5	2.50454	0.19214	10.0164	1.29e-23	3.67e-21
gene9014	2161.13	3.14535	0.256615	9.99691	1.57e-23	4.34e-21
gene5635	559.946	3.96471	0.339438	9.97152	2.03e-23	5.44e-21
gene4791	162.127	4.32849	0.376277	9.96206	2.23e-23	5.81e-21
gene212	148.473	-3.66176	0.310125	-9.93715	2.87e-23	6.87e-21
gene2194	1909.65	2.32333	0.175394	9.93949	2.8e-23	6.87e-21
gene8942	3280.07	3.06326	0.249795	9.94121	2.75e-23	6.87e-21
gene4789	296.903	6.3391	0.580375	9.92306	3.3e-23	7.71e-21
gene8550	728.913	4.93959	0.449366	9.70164	2.97e-22	6.75e-20
gene1513	182.527	-2.92125	0.241895	-9.67878	3.71e-22	8.24e-20
gene9376	94.1753	5.34091	0.493256	9.65199	4.82e-22	1.04e-19
gene579	7422.31	-2.44019	0.194212	-9.57816	9.88e-22	2.09e-19
gene7177	1009.61	-2.79472	0.232417	-9.52905	1.59e-21	3.28e-19
gene6122	2065.26	3.37954	0.296987	9.42646	4.24e-21	8.58e-19
gene9976	490.919	-2.89368	0.247047	-9.36536	7.58e-21	1.5e-18
gene3011	209.011	-2.90843	0.248712	-9.36196	7.83e-21	1.52e-18
gene3994	4653.13	3.42136	0.305105	9.31272	1.25e-20	2.36e-18
gene3053	140.184	-4.27555	0.398542	-9.27266	1.82e-20	3.37e-18
gene9247	20160	5.1737	0.495873	9.26385	1.97e-20	3.59e-18
gene653	1324.1	-2.23216	0.17848	-9.25687	2.11e-20	3.76e-18
gene2563	497.793	4.50176	0.424754	9.23303	2.63e-20	4.52e-18
gene7687	280.125	4.84417	0.461835	9.23309	2.63e-20	4.52e-18
gene2685	127.023	-4.94235	0.474015	-9.20296	3.48e-20	5.87e-18
gene5931	1626.21	2.88841	0.25116	9.19099	3.89e-20	6.44e-18
gene5939	556.136	-2.34824	0.192865	-9.16829	4.81e-20	7.81e-18
gene9437	142.811	6.38067	0.633802	9.15217	5.58e-20	8.91e-18
gene7769	1352.66	2.25738	0.183382	9.14694	5.86e-20	9.19e-18
gene5017	177.231	3.56286	0.326679	9.13086	6.8e-20	1.05e-17
gene5187	54463.1	5.4354	0.532656	9.11545	7.83e-20	1.19e-17
gene5837	802.797	2.02412	0.160563	8.99411	2.38e-19	3.55e-17
gene754	134.895	3.96045	0.376074	8.9888	2.5e-19	3.67e-17
gene1911	297.132	-2.36129	0.204107	-8.72724	2.61e-18	3.77e-16
gene4447	405.027	-2.97714	0.274991	-8.71714	2.85e-18	4.06e-16
gene5369	7425.74	-2.49465	0.220048	-8.70106	3.29e-18	4.6e-16
gene5637	398.441	4.29011	0.426889	8.69105	3.59e-18	4.95e-16
gene4022	4374.26	2.93691	0.271363	8.68544	3.77e-18	5.12e-16
gene4511	3882.07	1.70382	0.129549	8.67492	4.14e-18	5.54e-16
gene2838	2851.34	2.82871	0.259723	8.6581	4.8e-18	6.33e-16
gene1030	119.083	-3.0963	0.292413	-8.6053	7.61e-18	9.9e-16
gene1431	2781.71	-5.73073	0.599427	-8.59276	8.49e-18	1.09e-15
gene8677	138.249	3.59237	0.350972	8.58293	9.25e-18	1.17e-15
gene9751	448.938	2.60796	0.237115	8.55265	1.2e-17	1.5e-15
gene10396	862.158	-2.91801	0.27358	-8.54597	1.27e-17	1.57e-15
gene205	219.04	4.41588	0.452854	8.47045	2.44e-17	2.97e-15
gene8250	252.198	-3.52123	0.348186	-8.44729	2.98e-17	3.57e-15
gene4836	1081.08	-3.9024	0.395163	-8.40766	4.18e-17	4.94e-15
gene6904	1434.62	2.95295	0.282469	8.40076	4.44e-17	5.11e-15
gene10255	7965.54	4.41085	0.455974	8.40146	4.41e-17	5.11e-15
gene5899	177.286	-2.60228	0.240821	-8.39744	4.56e-17	5.19e-15
gene10235	108.121	-5.16046	0.549965	-8.32863	8.18e-17	9.19e-15
gene3379	1829.19	3.90891	0.399922	8.32389	8.51e-17	9.45e-15
gene1844	455.823	4.05051	0.417218	8.31821	8.93e-17	9.79e-15
gene9776	14803.8	3.03082	0.295399	8.29662	1.07e-16	1.16e-14
gene9550	2590.43	-4.83909	0.518492	-8.21437	2.13e-16	2.28e-14
gene5522	1823.41	2.06195	0.180844	8.19466	2.51e-16	2.66e-14
gene3747	123.627	-2.76792	0.267258	-8.18654	2.69e-16	2.81e-14
gene8392	463.893	2.04055	0.178614	8.17715	2.91e-16	3.01e-14
gene7869	1007.26	1.7697	0.146565	8.11723	4.77e-16	4.88e-14
gene3434	1331.59	3.03753	0.303895	8.08676	6.13e-16	6.2e-14
gene4127	127.833	2.87363	0.283876	8.07966	6.49e-16	6.5e-14
gene2872	284.091	3.70163	0.387103	8.06409	7.38e-16	7.3e-14
gene8007	19784	2.60704	0.251744	8.052	8.15e-16	7.97e-14
gene5983	39232.1	2.5481	0.24523	8.02554	1.01e-15	9.79e-14
gene5639	267.436	2.29665	0.215719	7.95783	1.75e-15	1.68e-13
gene8764	422.912	2.39982	0.229703	7.92248	2.33e-15	2.21e-13
gene9076	706.676	2.86838	0.288981	7.91878	2.4e-15	2.25e-13
gene6580	5866.32	-1.88859	0.166201	-7.87358	3.45e-15	3.2e-13
gene3599	200.946	-4.94295	0.556138	-7.84509	4.33e-15	3.98e-13
gene9997	173.441	6.49695	0.757839	7.80766	5.83e-15	5.3e-13
gene3551	454.8	-5.12145	0.582625	-7.79481	6.45e-15	5.81e-13
gene5223	296.834	3.69559	0.399757	7.7937	6.51e-15	5.81e-13
gene2473	5049.18	2.42204	0.236492	7.78904	6.75e-15	5.97e-13
gene2190	350.601	2.00398	0.182882	7.78634	6.9e-15	6.04e-13
gene9217	62.4388	-3.77059	0.410328	-7.7757	7.5e-15	6.5e-13
gene4259	840.068	-2.63457	0.265665	-7.73369	1.04e-14	8.97e-13
gene1187	3927.98	1.79179	0.157114	7.71279	1.23e-14	1.05e-12
gene2365	22674.6	2.80093	0.288264	7.70451	1.31e-14	1.11e-12
gene7690	11704.6	2.0456	0.190831	7.68009	1.59e-14	1.33e-12
gene3706	135.35	-2.96678	0.31083	-7.67874	1.61e-14	1.33e-12
gene2494	583.372	2.73785	0.282012	7.65162	1.98e-14	1.63e-12
gene9965	117.318	-3.02196	0.319788	-7.63617	2.24e-14	1.82e-12
gene4471	4317.56	2.11059	0.200483	7.63451	2.27e-14	1.83e-12
gene8280	99.0806	9.8534	1.21944	7.60466	2.86e-14	2.28e-12
gene2394	1207.63	2.09526	0.199653	7.58945	3.21e-14	2.54e-12
gene10065	3634.41	2.20269	0.214024	7.5818	3.41e-14	2.67e-12
gene5951	487.33	-2.31431	0.22897	-7.5744	3.61e-14	2.81e-12
gene4792	85.3148	5.05219	0.591489	7.5609	4e-14	3.09e-12
gene6211	14581.4	2.5465	0.260717	7.54266	4.6e-14	3.52e-12
gene9026	227.806	-3.45441	0.381268	-7.53907	4.73e-14	3.59e-12
gene375	347.851	-1.8631	0.171223	-7.49375	6.69e-14	5.03e-12
gene5348	279.539	-2.20669	0.217298	-7.48596	7.1e-14	5.3e-12
gene9003	1098.42	-2.39323	0.242287	-7.48383	7.22e-14	5.34e-12
gene10061	778.532	2.73272	0.288455	7.46295	8.46e-14	6.21e-12
gene4398	2048.96	4.29703	0.50005	7.43331	1.06e-13	7.71e-12
gene9285	56956.9	2.35587	0.239151	7.42574	1.12e-13	8.1e-12
gene1413	795.301	-3.4697	0.390993	-7.39067	1.46e-13	1.05e-11
gene7956	157.804	-2.58373	0.271811	-7.37178	1.68e-13	1.2e-11
gene9433	2113.5	2.07848	0.204152	7.34005	2.14e-13	1.51e-11
gene1343	4703.96	-3.11769	0.345917	-7.33613	2.2e-13	1.54e-11
gene5548	431.486	-2.82325	0.305849	-7.3345	2.23e-13	1.55e-11
gene6481	520.648	-1.66085	0.148874	-7.26013	3.87e-13	2.65e-11
gene2506	3833.93	1.77438	0.164508	7.2603	3.86e-13	2.65e-11
gene10011	161.905	3.60958	0.419446	7.22281	5.09e-13	3.46e-11
gene8055	206.826	2.45491	0.25976	7.21785	5.28e-13	3.56e-11
gene6535	106.389	3.20487	0.365656	7.17852	7.05e-13	4.72e-11
gene6699	42.5761	-3.84436	0.457101	-7.14144	9.24e-13	6.09e-11
gene3354	2765.61	3.2426	0.372811	7.14196	9.2e-13	6.09e-11
gene9667	820.339	-2.51413	0.27161	-7.12099	1.07e-12	7.02e-11
gene5805	2257.23	4.34279	0.530519	7.09266	1.32e-12	8.55e-11
gene7910	174.11	-4.68307	0.580654	-7.0663	1.59e-12	1.03e-10
gene5752	1338.56	3.06365	0.35224	7.05102	1.78e-12	1.14e-10
gene4224	505.355	1.77003	0.169124	7.03643	1.97e-12	1.26e-10
gene10174	268.368	2.93617	0.336055	7.01125	2.36e-12	1.49e-10
gene3566	657.513	-2.67124	0.298479	-7.00632	2.45e-12	1.54e-10
gene3568	157.734	-3.13974	0.367486	-6.96556	3.27e-12	2.04e-10
gene291	545.996	2.52972	0.280515	6.95052	3.64e-12	2.25e-10
gene1843	13545.6	8.20529	1.10241	6.9169	4.62e-12	2.84e-10
gene9601	668.884	-2.53725	0.283689	-6.89929	5.23e-12	3.19e-10
gene7277	2976.05	2.22954	0.239404	6.8902	5.57e-12	3.38e-10
gene1984	701.821	1.78083	0.175772	6.83171	8.39e-12	5.06e-10
gene255	1186.87	2.26711	0.247196	6.82498	8.79e-12	5.23e-10
gene1469	161.432	4.98061	0.644711	6.82571	8.75e-12	5.23e-10
gene549	98.3705	3.44698	0.422212	6.79038	1.12e-11	6.61e-10
gene4661	817.131	2.39175	0.267838	6.76435	1.34e-11	7.86e-10
gene6396	3661.39	2.4057	0.270112	6.75903	1.39e-11	8.1e-10
gene5626	394.894	-2.30003	0.255416	-6.73422	1.65e-11	9.55e-10
gene3799	337.328	-1.99464	0.210285	-6.72726	1.73e-11	9.96e-10
gene5865	157.238	-2.08934	0.225216	-6.70174	2.06e-11	1.18e-09
gene2616	84.4565	-2.68383	0.313967	-6.7008	2.07e-11	1.18e-09
gene3327	88.6038	-2.7566	0.325862	-6.67951	2.4e-11	1.36e-09
gene3473	282.307	-2.00692	0.213999	-6.66787	2.6e-11	1.46e-09
gene5403	224.629	-1.99406	0.213837	-6.61276	3.77e-11	2.09e-09
gene8760	1183.91	2.49181	0.289071	6.61362	3.75e-11	2.09e-09
gene260	4178.14	2.58147	0.302977	6.60601	3.95e-11	2.18e-09
gene2813	818.608	3.75799	0.481655	6.59806	4.17e-11	2.28e-09
gene9477	176.605	-2.89928	0.351948	-6.58984	4.4e-11	2.4e-09
gene4832	91.7494	4.12907	0.538979	6.5848	4.55e-11	2.47e-09
gene1035	1137	-3.00724	0.370003	-6.56005	5.38e-11	2.9e-09
gene1559	113.195	-3.34287	0.421674	-6.55216	5.67e-11	3.04e-09
gene7037	895.907	-2.08378	0.229782	-6.54436	5.98e-11	3.18e-09
gene1831	1130.4	2.10626	0.233804	6.52794	6.67e-11	3.53e-09
gene8122	7084.5	-3.66103	0.473032	-6.51337	7.35e-11	3.87e-09
gene577	112.724	-4.25812	0.565633	-6.50266	7.89e-11	4.13e-09
gene1310	2458.26	2.49654	0.295101	6.49453	8.33e-11	4.33e-09
gene7436	788.089	2.04687	0.226364	6.48014	9.16e-11	4.74e-09
gene9077	96.0835	2.81749	0.345679	6.47274	9.62e-11	4.95e-09
gene4918	2149.98	-3.26338	0.415008	-6.46585	1.01e-10	5.15e-09
gene3440	381.732	-3.91297	0.517114	-6.44533	1.15e-10	5.86e-09
gene1628	2414.97	2.55108	0.306073	6.43989	1.2e-10	6.04e-09
gene1367	606.545	1.70747	0.175367	6.42919	1.28e-10	6.45e-09
gene9789	30878.7	-2.01003	0.223144	-6.40854	1.47e-10	7.35e-09
gene4383	105.149	-2.69325	0.330265	-6.39867	1.57e-10	7.8e-09
gene4535	3471.48	3.21802	0.41263	6.39318	1.62e-10	8.04e-09
gene7063	1342.48	3.40148	0.441511	6.3905	1.65e-10	8.13e-09
gene3598	75.6798	-3.49184	0.456634	-6.37674	1.81e-10	8.85e-09
gene7032	647.489	2.84557	0.35692	6.34757	2.19e-10	1.06e-08
gene3368	282.452	1.86028	0.202752	6.3145	2.71e-10	1.31e-08
gene652	322.71	-2.79268	0.350556	-6.31192	2.76e-10	1.33e-08
gene5054	475.869	4.43743	0.611473	6.30842	2.82e-10	1.35e-08
gene9253	1070.2	-2.66791	0.331174	-6.30457	2.89e-10	1.38e-08
gene4138	1181.65	1.72995	0.182863	6.28862	3.2e-10	1.52e-08
gene2478	453.439	-3.30641	0.434566	-6.27387	3.52e-10	1.66e-08
gene2166	170.199	2.31379	0.276604	6.26811	3.65e-10	1.71e-08
gene10382	180.039	3.63564	0.488666	6.25302	4.03e-10	1.88e-08
gene8944	719.86	2.39459	0.291081	6.23396	4.55e-10	2.11e-08
gene9258	164.422	-4.13441	0.571258	-6.22207	4.91e-10	2.27e-08
gene5366	1551.06	2.40084	0.292804	6.21863	5.02e-10	2.31e-08
gene5267	379.178	2.77546	0.354826	6.18742	6.12e-10	2.8e-08
gene7271	572.517	-2.3998	0.294398	-6.18143	6.35e-10	2.89e-08
gene6773	3337.95	2.13565	0.252106	6.17062	6.8e-10	3.08e-08
gene5597	722.515	-2.19297	0.261913	-6.15844	7.35e-10	3.31e-08
gene2189	160.302	2.23495	0.268973	6.15284	7.61e-10	3.41e-08
gene859	252.476	2.98395	0.393376	6.11107	9.9e-10	4.42e-08
gene7068	1676.08	2.18047	0.26273	6.09168	1.12e-09	4.96e-08
gene9242	408.188	3.96042	0.555048	6.09032	1.13e-09	4.98e-08
gene644	850.763	2.07999	0.246574	6.08335	1.18e-09	5.17e-08
gene3087	88.1247	-2.66448	0.342762	-6.08143	1.19e-09	5.21e-08
gene7836	407.878	1.83545	0.206615	6.0763	1.23e-09	5.36e-08
gene3601	338.556	-3.06993	0.412199	-6.0406	1.54e-09	6.65e-08
gene4972	99.5036	2.34105	0.291708	6.03703	1.57e-09	6.77e-08
gene9	420.74	-2.15416	0.260802	-6.03584	1.58e-09	6.79e-08
gene10388	136.239	-2.14903	0.260075	-6.03298	1.61e-09	6.88e-08
gene6612	172.657	2.90558	0.385676	6.02988	1.64e-09	6.98e-08
gene8368	31.7853	4.15008	0.592863	6.02176	1.73e-09	7.3e-08
gene4842	98.987	2.73873	0.358968	6.01373	1.81e-09	7.64e-08
gene6565	1013.62	1.58176	0.166677	6.01021	1.85e-09	7.77e-08
gene7247	577.146	1.8797	0.21637	6.00683	1.89e-09	7.9e-08
gene7711	1298.26	1.6644	0.181459	5.97602	2.29e-09	9.5e-08
gene3211	15612.7	2.2821	0.28626	5.94599	2.75e-09	1.14e-07
gene3489	52.7686	7.28273	1.1284	5.94005	2.85e-09	1.17e-07
gene6707	527.461	2.87509	0.386662	5.93566	2.93e-09	1.2e-07
gene3721	181.735	-3.48737	0.489969	-5.93378	2.96e-09	1.21e-07
gene7092	90.2973	-2.26964	0.284829	-5.93211	2.99e-09	1.22e-07
gene264	3597.15	2.04306	0.246832	5.92737	3.08e-09	1.25e-07
gene5160	40.5497	-3.35263	0.47023	-5.89633	3.72e-09	1.5e-07
gene8265	460.515	3.52033	0.499255	5.88944	3.88e-09	1.55e-07
gene6172	450.385	2.42643	0.314209	5.87645	4.19e-09	1.67e-07
gene3188	212.08	-2.08535	0.256266	-5.87416	4.25e-09	1.69e-07
gene7211	2299.84	-1.94714	0.232947	-5.8689	4.39e-09	1.74e-07
gene8199	310.352	-2.93787	0.402634	-5.85612	4.74e-09	1.86e-07
gene3942	64628.4	-2.06282	0.253195	-5.85644	4.73e-09	1.86e-07
gene9464	58.2343	4.64002	0.694198	5.84851	4.96e-09	1.94e-07
gene2193	4720.43	2.01585	0.245719	5.84346	5.11e-09	1.99e-07
gene3529	351.162	-3.84546	0.559383	-5.83761	5.3e-09	2.05e-07
gene8654	3894.76	1.95807	0.236437	5.82849	5.59e-09	2.16e-07
gene10253	81.991	-3.49603	0.500644	-5.82456	5.73e-09	2.2e-07
gene2470	408.724	-1.91359	0.229073	-5.82169	5.83e-09	2.23e-07
gene1811	51.1911	4.42238	0.661675	5.80706	6.36e-09	2.42e-07
gene8127	2311.76	-2.48143	0.327593	-5.80424	6.47e-09	2.44e-07
gene9147	1012.34	3.39026	0.484144	5.80461	6.45e-09	2.44e-07
gene8173	4004.05	-3.62262	0.525113	-5.79421	6.86e-09	2.58e-07
gene5589	1400.33	2.26287	0.290976	5.78354	7.31e-09	2.74e-07
gene3036	2303.29	2.01114	0.247863	5.77392	7.74e-09	2.89e-07
gene5357	43.107	-2.6786	0.363701	-5.77011	7.92e-09	2.94e-07
gene4788	51.1084	3.7577	0.551153	5.76554	8.14e-09	3.01e-07
gene6472	83.653	-3.68254	0.539325	-5.75263	8.79e-09	3.24e-07
gene1430	1649.33	-3.83441	0.566563	-5.74412	9.24e-09	3.39e-07
gene3402	1482.55	-2.32415	0.304029	-5.7368	9.65e-09	3.53e-07
gene3320	1022.17	1.51426	0.163221	5.7239	1.04e-08	3.79e-07
gene5208	89.7217	2.57715	0.34906	5.72151	1.06e-08	3.83e-07
gene252	269.383	2.59324	0.353183	5.70028	1.2e-08	4.32e-07
gene8197	205.72	2.79192	0.388556	5.69266	1.25e-08	4.5e-07
gene7387	122.988	-2.27545	0.298269	-5.68429	1.31e-08	4.71e-07
gene9296	533.549	4.40265	0.672579	5.68357	1.32e-08	4.71e-07
gene8292	2246.81	6.63771	1.07305	5.64535	1.65e-08	5.86e-07
gene5376	396.235	-1.66578	0.192681	-5.6351	1.75e-08	6.2e-07
gene8058	63.1461	-4.16804	0.637898	-5.62478	1.86e-08	6.55e-07
gene6306	54.85	7.43831	1.21951	5.62382	1.87e-08	6.56e-07
gene1835	131.554	2.26332	0.299983	5.61139	2.01e-08	7.03e-07
gene1204	1525.36	2.22891	0.294244	5.60386	2.1e-08	7.3e-07
gene2810	294.18	3.51962	0.524614	5.60339	2.1e-08	7.3e-07
gene5971	437.898	-2.16472	0.282961	-5.6005	2.14e-08	7.37e-07
gene8996	1171.32	1.85061	0.226855	5.60098	2.13e-08	7.37e-07
gene10381	60.1102	4.24366	0.654246	5.59982	2.15e-08	7.37e-07
gene6218	1770.19	1.63171	0.188071	5.5921	2.24e-08	7.68e-07
gene1699	3979.8	3.55282	0.532366	5.58417	2.35e-08	8e-07
gene6342	27.0045	-3.19427	0.469861	-5.56393	2.64e-08	8.96e-07
gene5164	1160.12	-2.37754	0.323573	-5.55527	2.77e-08	9.38e-07
gene3591	2189.75	-1.70063	0.201987	-5.54803	2.89e-08	9.74e-07
gene8612	110.834	-1.96324	0.250465	-5.52271	3.34e-08	1.12e-06
gene5216	84.916	4.40426	0.692784	5.52013	3.39e-08	1.13e-06
gene1971	495.545	-2.20109	0.293916	-5.51548	3.48e-08	1.16e-06
gene1634	139.738	-1.73976	0.210266	-5.5157	3.47e-08	1.16e-06
gene6924	5311.46	1.66881	0.197922	5.5012	3.77e-08	1.25e-06
gene9262	263.459	-1.80952	0.224789	-5.46968	4.51e-08	1.49e-06
gene5636	8309.55	2.13754	0.28501	5.46485	4.63e-08	1.52e-06
gene8558	2537.12	2.19271	0.29558	5.45607	4.87e-08	1.59e-06
gene3552	276.251	-2.1587	0.289466	-5.45383	4.93e-08	1.6e-06
gene213	265.116	-1.63058	0.192622	-5.4541	4.92e-08	1.6e-06
gene1533	117.038	2.68643	0.387918	5.43009	5.63e-08	1.82e-06
gene3843	3189.81	-1.75055	0.215666	-5.4276	5.71e-08	1.84e-06
gene3516	55.5733	-5.85154	0.973127	-5.41712	6.06e-08	1.95e-06
gene6385	38593.2	-1.98411	0.259259	-5.41585	6.1e-08	1.95e-06
gene290	538.237	1.95258	0.254808	5.38674	7.17e-08	2.29e-06
gene9131	204.995	2.97719	0.446332	5.37086	7.84e-08	2.49e-06
gene171	703.506	3.01383	0.453729	5.36407	8.14e-08	2.58e-06
gene5244	33.6797	-2.93615	0.440947	-5.3434	9.12e-08	2.88e-06
gene4605	2222.52	-1.80181	0.228671	-5.34308	9.14e-08	2.88e-06
gene5159	35.3691	-2.91161	0.436897	-5.33674	9.46e-08	2.97e-06
gene3889	884.345	1.48521	0.16967	5.33514	9.55e-08	2.99e-06
gene2181	4927.92	1.84502	0.237405	5.32854	9.9e-08	3.09e-06
gene970	74.3311	3.23169	0.498049	5.32414	1.01e-07	3.15e-06
gene129	483.078	1.75167	0.220305	5.31843	1.05e-07	3.24e-06
gene6599	132.829	-2.39785	0.342384	-5.3094	1.1e-07	3.39e-06
gene920	140.443	-2.03266	0.273866	-5.30426	1.13e-07	3.48e-06
gene1398	895.712	1.42804	0.159963	5.3015	1.15e-07	3.52e-06
gene6647	280.918	1.64702	0.201329	5.29987	1.16e-07	3.54e-06
gene9336	59.3628	3.85401	0.617838	5.29915	1.16e-07	3.54e-06
gene2464	385.333	-2.64448	0.389654	-5.29825	1.17e-07	3.55e-06
gene1116	128.15	-2.79011	0.418984	-5.27494	1.33e-07	4.02e-06
gene65	1885.78	6.53793	1.13079	5.26883	1.37e-07	4.14e-06
gene9931	571.683	-1.75091	0.222557	-5.26115	1.43e-07	4.3e-06
gene8447	395.563	-2.97377	0.457786	-5.22902	1.7e-07	5.1e-06
gene1567	417.647	-3.56911	0.572815	-5.21829	1.81e-07	5.39e-06
gene5095	1241.92	1.84016	0.242671	5.19286	2.07e-07	6.16e-06
gene4413	226.31	2.22571	0.317322	5.18625	2.15e-07	6.36e-06
gene1612	20.7738	-3.89443	0.639711	-5.18114	2.21e-07	6.52e-06
gene9130	89.9177	5.91482	1.03058	5.17654	2.26e-07	6.66e-06
gene10159	11562.8	10.145	1.8498	5.17086	2.33e-07	6.84e-06
gene10169	75.3746	3.5354	0.572368	5.16346	2.42e-07	7.09e-06
gene2479	504.102	-2.39358	0.351393	-5.16112	2.45e-07	7.16e-06
gene6485	935.135	-2.51767	0.37594	-5.15422	2.55e-07	7.41e-06
gene3800	522.783	-1.7761	0.232378	-5.1472	2.64e-07	7.66e-06
gene7004	2459.52	1.49586	0.178013	5.14494	2.68e-07	7.73e-06
gene984	12267.2	-1.42072	0.163632	-5.13788	2.78e-07	8e-06
gene5109	2264.04	1.96667	0.270618	5.1241	2.99e-07	8.58e-06
gene5016	31.3671	3.68101	0.606813	5.11031	3.22e-07	9.2e-06
gene7031	71.5444	-2.79718	0.434675	-5.10077	3.38e-07	9.65e-06
gene1041	3825.66	2.07252	0.293547	5.08446	3.69e-07	1.05e-05
gene8522	4292.19	1.61466	0.203811	5.07657	3.84e-07	1.09e-05
gene842	26.7376	-3.36358	0.551054	-5.05138	4.39e-07	1.24e-05
gene2934	38.6898	3.4972	0.577963	5.04739	4.48e-07	1.26e-05
gene9073	593.066	1.58502	0.199331	5.04196	4.61e-07	1.29e-05
gene9028	518.586	-2.1287	0.308154	-5.02573	5.02e-07	1.4e-05
gene4551	9293.71	1.22081	0.127499	5.02602	5.01e-07	1.4e-05
gene6492	32641	7.69011	1.41695	5.01792	5.22e-07	1.45e-05
gene6051	87.8101	-1.85144	0.253604	-5.01349	5.35e-07	1.48e-05
gene8130	1253.25	1.93648	0.270639	5.01212	5.38e-07	1.49e-05
gene3309	1448.49	-2.07607	0.298634	-5.00972	5.45e-07	1.5e-05
gene7477	1848.57	-2.2446	0.332775	-5.00216	5.67e-07	1.56e-05
gene3427	6001.62	1.62517	0.209072	4.9991	5.76e-07	1.58e-05
gene7012	571.781	1.56199	0.196732	4.99149	5.99e-07	1.64e-05
gene800	273.172	2.26565	0.337876	4.98897	6.07e-07	1.65e-05
gene1415	62.1745	2.26514	0.338048	4.98492	6.2e-07	1.68e-05
gene2412	5163.32	3.55284	0.597308	4.97707	6.46e-07	1.75e-05
gene3597	211.869	-1.73899	0.232909	-4.97615	6.49e-07	1.75e-05
gene4928	2298.54	1.33923	0.152668	4.97308	6.59e-07	1.77e-05
gene2206	297.251	1.95996	0.277617	4.97074	6.67e-07	1.79e-05
gene10392	99.7245	-3.72638	0.633606	-4.96583	6.84e-07	1.83e-05
gene9101	2047.1	-2.74892	0.437127	-4.96175	6.99e-07	1.86e-05
gene1554	4689.28	-2.22012	0.330726	-4.95915	7.08e-07	1.88e-05
gene6440	40.7717	-2.97143	0.482851	-4.95272	7.32e-07	1.94e-05
gene6407	87.4499	4.41185	0.773681	4.95275	7.32e-07	1.94e-05
gene4827	360.919	1.89585	0.265736	4.95174	7.36e-07	1.94e-05
gene4878	1043.85	2.21201	0.329721	4.94969	7.43e-07	1.96e-05
gene2909	240.53	2.8665	0.462963	4.93884	7.86e-07	2.06e-05
gene2200	1615.21	2.25578	0.340119	4.92702	8.35e-07	2.18e-05
gene9192	16130.4	-2.30323	0.349912	-4.92475	8.45e-07	2.2e-05
gene3135	3282.01	-1.97704	0.28375	-4.92348	8.5e-07	2.21e-05
gene9387	28.35	-3.72159	0.638477	-4.92045	8.63e-07	2.24e-05
gene5426	31.1555	2.63609	0.418086	4.91786	8.75e-07	2.26e-05
gene2786	25.3994	3.96163	0.687655	4.91762	8.76e-07	2.26e-05
gene5175	183.496	-2.6013	0.412243	-4.90319	9.43e-07	2.42e-05
gene3366	394.389	-6.56196	1.22093	-4.89953	9.61e-07	2.46e-05
gene2695	1194.66	3.14419	0.523553	4.89767	9.7e-07	2.48e-05
gene5792	514.818	-2.41143	0.374756	-4.887	1.02e-06	2.61e-05
gene8176	7350.49	-2.33893	0.359948	-4.88661	1.03e-06	2.61e-05
gene6345	3302.14	-3.44061	0.586	-4.88158	1.05e-06	2.67e-05
gene4087	302.116	6.1743	1.14789	4.87354	1.1e-06	2.77e-05
gene7374	148.753	2.65363	0.426649	4.86028	1.17e-06	2.96e-05
gene4135	264.906	-1.4506	0.179219	-4.85774	1.19e-06	2.99e-05
gene3708	3928.42	-3.00561	0.499873	-4.85245	1.22e-06	3.03e-05
gene1732	92.3638	-2.25492	0.345178	-4.85234	1.22e-06	3.03e-05
gene3098	82.0011	-2.16279	0.326167	-4.85271	1.22e-06	3.03e-05
gene3575	125.679	-1.8728	0.266349	-4.85379	1.21e-06	3.03e-05
gene2509	157.265	-2.1157	0.317491	-4.837	1.32e-06	3.27e-05
gene3719	234.361	-2.10335	0.315097	-4.83454	1.33e-06	3.3e-05
gene2155	156.849	-1.83515	0.260199	-4.82383	1.41e-06	3.47e-05
gene5429	513.067	2.01012	0.296963	4.81581	1.47e-06	3.61e-05
gene1383	533.649	-2.41301	0.381474	-4.80507	1.55e-06	3.79e-05
gene7579	13.9833	-5.04846	0.93233	-4.79279	1.64e-06	4.02e-05
gene10287	165.955	2.34703	0.369343	4.78424	1.72e-06	4.19e-05
gene367	32.6871	3.25437	0.559744	4.77784	1.77e-06	4.31e-05
gene2697	1028.38	1.42996	0.178274	4.76772	1.86e-06	4.52e-05
gene3909	350.944	-1.50361	0.193791	-4.76601	1.88e-06	4.55e-05
gene4384	1003.85	3.0972	0.528842	4.75984	1.94e-06	4.68e-05
gene642	468.866	-2.17759	0.335767	-4.75804	1.95e-06	4.71e-05
gene6179	397.644	-2.31763	0.365373	-4.75576	1.98e-06	4.74e-05
gene6187	123.479	1.75543	0.247179	4.75537	1.98e-06	4.74e-05
gene3600	563.34	-3.16527	0.543829	-4.75384	2e-06	4.77e-05
gene3272	222.562	1.55336	0.204942	4.74946	2.04e-06	4.85e-05
gene4806	75.5434	2.22596	0.346556	4.74949	2.04e-06	4.85e-05
gene3287	452.566	2.52046	0.408604	4.74899	2.04e-06	4.85e-05
gene8925	234.926	-1.76684	0.250088	-4.7457	2.08e-06	4.91e-05
gene944	177.833	2.00401	0.30011	4.74498	2.09e-06	4.92e-05
gene5552	862.812	-1.62668	0.22069	-4.74277	2.11e-06	4.96e-05
gene10327	526.061	-2.50517	0.406376	-4.73741	2.16e-06	5.08e-05
gene8381	212.575	1.54625	0.20403	4.73581	2.18e-06	5.1e-05
gene1436	30.1436	4.33659	0.793666	4.73321	2.21e-06	5.16e-05
gene846	864.238	1.75499	0.24833	4.73158	2.23e-06	5.19e-05
gene7347	1759.41	1.74611	0.247053	4.72007	2.36e-06	5.47e-05
gene6509	274.967	2.15127	0.333507	4.71134	2.46e-06	5.7e-05
gene5383	3104.79	1.87108	0.274439	4.70445	2.55e-06	5.88e-05
gene1114	2681.5	1.96095	0.293608	4.70339	2.56e-06	5.9e-05
gene9721	900.415	1.68363	0.23484	4.69948	2.61e-06	5.99e-05
gene6333	1440.31	-2.15612	0.336017	-4.69061	2.72e-06	6.24e-05
gene6861	8012.95	2.20004	0.34568	4.68653	2.78e-06	6.35e-05
gene3582	500.096	-2.29318	0.366158	-4.6788	2.89e-06	6.58e-05
gene4434	1649.5	1.88284	0.278582	4.67667	2.92e-06	6.63e-05
gene2943	18308.3	-1.85007	0.271856	-4.67184	2.99e-06	6.78e-05
gene3068	368.294	-2.20138	0.347385	-4.66738	3.05e-06	6.91e-05
gene4446	1590.56	1.81602	0.265355	4.65798	3.19e-06	7.21e-05
gene2851	1234.74	-2.2491	0.359396	-4.64419	3.41e-06	7.67e-05
gene8965	1657.92	1.32434	0.160274	4.64419	3.41e-06	7.67e-05
gene5072	1164.16	2.61257	0.438603	4.63418	3.58e-06	8.01e-05
gene4074	267.463	3.68237	0.669403	4.63454	3.58e-06	8.01e-05
gene9383	1540.31	1.91488	0.288186	4.63201	3.62e-06	8.08e-05
gene3035	46395.2	2.14978	0.339041	4.63008	3.66e-06	8.13e-05
gene4115	85.0236	-2.53711	0.423237	-4.62414	3.76e-06	8.35e-05
gene8849	51.5289	-2.94546	0.511999	-4.62006	3.84e-06	8.49e-05
gene8569	647.186	2.68036	0.454698	4.61925	3.85e-06	8.51e-05
gene829	748.378	1.85369	0.275913	4.61628	3.91e-06	8.61e-05
gene6400	118.996	-2.16995	0.344842	-4.61067	4.01e-06	8.82e-05
gene9064	236.575	-2.51655	0.420925	-4.60069	4.21e-06	9.23e-05
gene6503	382.474	1.73096	0.250206	4.60006	4.22e-06	9.24e-05
gene3080	64.5626	-1.94574	0.29699	-4.59861	4.25e-06	9.28e-05
gene4703	28.7611	4.9935	0.960053	4.59714	4.28e-06	9.33e-05
gene9255	65.8929	-2.37083	0.389751	-4.59481	4.33e-06	9.41e-05
gene5421	1055.17	1.84874	0.276272	4.59237	4.38e-06	9.5e-05
gene1258	66.0836	-1.98747	0.306548	-4.59135	4.4e-06	9.52e-05
gene4507	5974.87	1.53679	0.208636	4.58594	4.52e-06	9.75e-05
gene1118	5255.71	1.69411	0.243733	4.57102	4.85e-06	0.000104424
gene9996	23.6367	4.60952	0.883503	4.56084	5.09e-06	0.000109361
gene6567	47.0524	3.69136	0.682617	4.55799	5.16e-06	0.000110593
gene8693	260.769	-1.88618	0.287135	-4.54902	5.39e-06	0.000115145
gene6540	1644.58	2.09897	0.334063	4.54696	5.44e-06	0.000116003
gene2804	394.593	1.90496	0.29149	4.54546	5.48e-06	0.000116558
gene9607	155.465	-1.88086	0.28639	-4.54228	5.56e-06	0.000117995
gene9561	43.8088	4.77518	0.923663	4.5419	5.57e-06	0.000117995
gene7831	330.441	-1.73287	0.254407	-4.53161	5.85e-06	0.000123606
gene9172	495.474	1.68536	0.244069	4.52889	5.93e-06	0.000124917
gene4932	71.1579	4.19308	0.800256	4.51491	6.33e-06	0.00013314
gene1451	254693	-1.77907	0.265761	-4.51185	6.43e-06	0.000134762
gene3534	229.576	-1.9151	0.296053	-4.50966	6.49e-06	0.000135848
gene9375	469.212	1.46932	0.197415	4.50482	6.64e-06	0.000138666
gene8534	2819.38	1.9732	0.309327	4.50398	6.67e-06	0.000138896
gene3755	46.628	-2.46137	0.418728	-4.49306	7.02e-06	0.00014588
gene4174	273.819	-2.05747	0.328989	-4.49093	7.09e-06	0.000147008
gene9670	177.743	1.82507	0.277439	4.48774	7.2e-06	0.000148893
gene7270	357.441	2.2099	0.364025	4.47744	7.55e-06	0.000155897
gene6008	4183.79	2.08909	0.337197	4.4754	7.63e-06	0.000157043
gene10275	1162.18	8.1597	1.69635	4.46825	7.89e-06	0.000162015
gene8683	21.8674	-3.24169	0.596343	-4.46336	8.07e-06	0.000165387
gene2387	1008.91	1.74493	0.261206	4.4598	8.2e-06	0.000167775
gene9642	80.3333	6.01077	1.21883	4.45572	8.36e-06	0.000170615
gene7832	107.274	-2.02811	0.325094	-4.45443	8.41e-06	0.000171262
gene1202	3654.52	1.62386	0.23437	4.45391	8.43e-06	0.000171298
gene8287	42.5424	-2.6343	0.461308	-4.4532	8.46e-06	0.000171477
gene5306	1579.06	-1.92681	0.302689	-4.44947	8.61e-06	0.000174099
gene2979	2688.37	1.75966	0.265168	4.44871	8.64e-06	0.00017433
gene8338	16.7921	-4.84747	0.959728	-4.44655	8.73e-06	0.000175605
gene8440	3614.74	2.00422	0.320324	4.44619	8.74e-06	0.000175605
gene810	10468	-1.39464	0.183682	-4.43507	9.2e-06	0.000184509
gene5607	596.293	-1.73899	0.261358	-4.43447	9.23e-06	0.000184618
gene6671	524.952	2.37027	0.403837	4.43315	9.29e-06	0.000185348
gene7917	7891.81	1.50627	0.209123	4.42929	9.45e-06	0.00018828
gene9132	97.975	5.54195	1.12171	4.42357	9.71e-06	0.000192914
gene5744	224.186	1.83337	0.283906	4.41475	1.01e-05	0.000200514
gene8644	14296	-1.22199	0.14595	-4.39869	1.09e-05	0.00021547
gene471	50.5829	-2.33362	0.399821	-4.38601	1.15e-05	0.000227918
gene6477	819.14	-2.58499	0.458675	-4.37126	1.24e-05	0.00024335
gene5578	35.9527	-2.75237	0.497741	-4.36446	1.27e-05	0.000250498
gene7970	1452.93	-1.84498	0.290233	-4.3585	1.31e-05	0.000256867
gene8184	261.756	-5.65156	1.16389	-4.35743	1.32e-05	0.000257562
gene4119	162.553	2.34716	0.405799	4.35478	1.33e-05	0.000260141
gene4678	93.7636	-2.3717	0.411894	-4.34989	1.36e-05	0.000265441
gene3322	311.402	1.51233	0.214694	4.34259	1.41e-05	0.000273827
gene8382	774.949	1.44869	0.200078	4.34175	1.41e-05	0.00027429
gene10307	75.8969	4.21149	0.838081	4.3331	1.47e-05	0.000284694
gene3280	3353.11	2.14967	0.362895	4.3254	1.52e-05	0.000294205
gene2711	35.1749	-2.56804	0.46054	-4.31676	1.58e-05	0.000305301
gene5620	618.006	2.17494	0.369693	4.31423	1.6e-05	0.000307521
gene6722	163.67	3.16891	0.600053	4.31448	1.6e-05	0.000307521
gene4373	15.3541	-3.30639	0.632736	-4.30888	1.64e-05	0.000314377
gene9115	444.212	9.1659	1.99476	4.30422	1.68e-05	0.000320392
gene5113	4718.51	-2.41427	0.426451	-4.30125	1.7e-05	0.000324047
gene3611	146.784	3.40939	0.661154	4.27947	1.87e-05	0.000356685
gene20	669.716	5.09343	1.05608	4.27374	1.92e-05	0.00036522
gene9254	52.5821	-2.65019	0.48479	-4.27028	1.95e-05	0.000370164
gene6897	19636.6	-1.7948	0.284602	-4.26843	1.97e-05	0.000372472
gene4589	1449.19	1.64656	0.250879	4.25128	2.13e-05	0.000401338
gene8922	122.295	-1.62303	0.246191	-4.23668	2.27e-05	0.00042744
gene1916	281.839	1.69314	0.263001	4.23244	2.31e-05	0.000434677
gene4296	1473.55	-1.66093	0.255714	-4.22712	2.37e-05	0.000444174
gene1743	20.6335	-3.43848	0.676797	-4.22354	2.4e-05	0.00045035
gene2451	92.103	-1.91922	0.317655	-4.21595	2.49e-05	0.00046483
gene89	396.326	-1.77092	0.283167	-4.20573	2.6e-05	0.000485348
gene5360	45.7033	-1.97884	0.33265	-4.20512	2.61e-05	0.000485643
gene9970	442.844	-1.92971	0.321253	-4.20138	2.65e-05	0.000492751
gene7701	1424.38	1.7206	0.271732	4.19753	2.7e-05	0.00049916
gene2561	7898.42	1.80509	0.291845	4.19774	2.7e-05	0.00049916
gene6053	1324.43	-2.70464	0.506392	-4.19565	2.72e-05	0.000502289
gene3588	120.612	-1.77169	0.284131	-4.19416	2.74e-05	0.000504586
gene9001	2973.93	1.67295	0.261792	4.17489	2.98e-05	0.000548137
gene3515	11.7001	-6.33952	1.38019	-4.173	3.01e-05	0.000551581
gene4559	343.231	-1.94455	0.327143	-4.1711	3.03e-05	0.000555087
gene6045	781.681	2.88091	0.552249	4.16643	3.09e-05	0.00056545
gene10180	2431.65	-1.46124	0.211884	-4.15907	3.2e-05	0.000581636
gene782	232.087	2.05972	0.355744	4.1595	3.19e-05	0.000581636
gene1046	3669.66	1.64815	0.256861	4.15847	3.2e-05	0.000581999
gene1915	742.788	-1.32107	0.178294	-4.15644	3.23e-05	0.000586032
gene9585	240.651	1.62182	0.251393	4.14419	3.41e-05	0.00061703
gene7371	3475.56	1.79762	0.294033	4.1411	3.46e-05	0.000624155
gene9436	101.724	-2.10914	0.369301	-4.14062	3.46e-05	0.000624208
gene8989	46.7662	-3.17449	0.626927	-4.13843	3.5e-05	0.000628947
gene3314	133.839	-1.84824	0.306521	-4.13753	3.51e-05	0.000629446
gene4107	1414.78	1.45351	0.211129	4.13735	3.51e-05	0.000629446
gene115	255.036	-1.98549	0.33983	-4.13586	3.54e-05	0.000631059
gene8155	401.547	-1.36172	0.188994	-4.13621	3.53e-05	0.000631059
gene8260	36.8408	-2.28064	0.41139	-4.13389	3.57e-05	0.000635015
gene9650	4760.04	6.49725	1.43153	4.13352	3.57e-05	0.000635015
gene3709	1568.98	-1.6553	0.260608	-4.12614	3.69e-05	0.000654474
gene6575	263.987	-1.79971	0.296003	-4.12059	3.78e-05	0.000669112
gene10168	678.537	1.71882	0.276493	4.11881	3.81e-05	0.000673007
gene4921	42.6943	-2.54736	0.478053	-4.11537	3.87e-05	0.000681457
gene1166	978.901	1.24611	0.161872	4.11504	3.87e-05	0.000681457
gene9161	348.6	1.87889	0.316088	4.10929	3.97e-05	0.000695963
gene8301	95.2381	2.75693	0.529703	4.10972	3.96e-05	0.000695963
gene2832	4191.98	-1.8178	0.301617	-4.10387	4.06e-05	0.000711087
gene4666	884.401	2.52634	0.474593	4.10107	4.11e-05	0.000718375
gene2312	364.623	1.70212	0.273674	4.10021	4.13e-05	0.000719674
gene97	33.7746	2.5772	0.487969	4.09289	4.26e-05	0.000741365
gene4216	527.077	2.0398	0.356711	4.09239	4.27e-05	0.000741527
gene4737	2666.78	-2.62068	0.499967	-4.08163	4.47e-05	0.000773782
gene10267	3425	2.45278	0.458825	4.08167	4.47e-05	0.000773782
gene561	110.992	-1.72592	0.280819	-4.08062	4.49e-05	0.000775681
gene5402	291.224	-1.78711	0.295887	-4.07962	4.51e-05	0.00077754
gene86	60.6555	-1.85816	0.313834	-4.07272	4.65e-05	0.000799442
gene3345	19.4915	-2.87047	0.562486	-4.07205	4.66e-05	0.000800223
gene699	3872.35	1.4368	0.210563	4.06908	4.72e-05	0.000808956
gene7522	857.558	1.73034	0.283349	4.05979	4.91e-05	0.000840266
gene2637	461.982	-1.18351	0.148673	-4.05932	4.92e-05	0.000840346
gene4989	658.428	2.11464	0.378402	4.05559	5e-05	0.000852287
gene9797	105.829	-1.83747	0.310298	-4.05246	5.07e-05	0.000862177
gene1372	1275.35	2.04208	0.36103	4.04975	5.13e-05	0.00087057
gene10009	3271.9	1.24495	0.164267	4.048	5.17e-05	0.000875485
gene2454	47.2213	-2.06935	0.369269	-4.03323	5.5e-05	0.000930657
gene2840	553.61	-1.41351	0.207292	-4.02094	5.8e-05	0.000978743
gene9199	51.9143	3.00095	0.603754	4.00983	6.08e-05	0.00102407
gene2622	18.985	-5.05294	1.11569	-4.00913	6.09e-05	0.00102521
gene2139	14.7925	-2.86903	0.571344	-4.0064	6.17e-05	0.00103344
gene7874	1227.25	1.50996	0.232121	4.00637	6.17e-05	0.00103344
gene2821	376.781	-1.6794	0.274532	-4.00463	6.21e-05	0.00103917
gene1978	425.263	-1.93525	0.338821	-3.9999	6.34e-05	0.00105657
gene7419	1090.88	1.59965	0.254923	3.99983	6.34e-05	0.00105657
gene4676	53.5872	-2.62191	0.510867	-3.99694	6.42e-05	0.00106762
gene9553	94.3905	1.89034	0.327896	3.99619	6.44e-05	0.00106901
gene685	1213.62	1.58309	0.251137	3.99419	6.49e-05	0.00107616
gene2567	4128.03	-2.16163	0.396247	-3.99151	6.57e-05	0.00108637
gene8657	1457.33	1.51427	0.234132	3.99033	6.6e-05	0.00108981
gene9610	83.2586	2.70204	0.53379	3.97542	7.03e-05	0.00115832
gene7047	4250.01	1.38543	0.202629	3.97492	7.04e-05	0.00115864
gene9089	24.5017	3.03131	0.617644	3.9688	7.22e-05	0.00118667
gene6480	59.3226	-2.2576	0.423182	-3.96425	7.36e-05	0.00120516
gene7261	609.584	1.46405	0.222991	3.96449	7.36e-05	0.00120516
gene2426	240.603	-1.71191	0.286041	-3.95717	7.58e-05	0.00123922
gene8413	849.023	1.84878	0.32105	3.95198	7.75e-05	0.00126412
gene6459	69.9829	-2.70446	0.537632	-3.95151	7.77e-05	0.00126438
gene501	7.93875	6.16354	1.41412	3.94842	7.87e-05	0.00127851
gene6640	155.424	2.30295	0.436603	3.94627	7.94e-05	0.00128773
gene9030	121.601	-1.96675	0.351738	-3.94256	8.06e-05	0.00130552
gene624	7827.6	-1.21469	0.161058	-3.94073	8.12e-05	0.00131315
gene7535	383.486	1.39616	0.207142	3.94009	8.15e-05	0.00131436
gene5842	4448.95	-1.94757	0.347478	-3.9357	8.3e-05	0.00133622
gene9731	513.829	1.76153	0.300247	3.9352	8.31e-05	0.00133665
gene4503	130.707	-1.78806	0.307267	-3.93164	8.44e-05	0.00135421
gene823	154.886	-1.47223	0.227156	-3.92782	8.57e-05	0.00137349
gene4484	296.744	-2.11644	0.391325	-3.92626	8.63e-05	0.00137998
gene3334	176.329	-2.31115	0.441113	-3.92452	8.69e-05	0.00138514
gene762	560.186	1.67184	0.27818	3.92493	8.68e-05	0.00138514
gene10298	32097	-1.40489	0.210237	-3.9236	8.72e-05	0.00138796
gene4151	244.964	-1.35712	0.198085	-3.92315	8.74e-05	0.00138814
gene7049	2677.82	1.64772	0.272665	3.91589	9.01e-05	0.00142815
gene8929	66.8487	-2.15619	0.402896	-3.91215	9.15e-05	0.00144788
gene9569	13.5864	-3.81707	0.828535	-3.90698	9.35e-05	0.00147665
gene6235	255.38	-1.58137	0.256691	-3.90105	9.58e-05	0.00151067
gene9829	55.3482	4.40771	0.981396	3.90027	9.61e-05	0.00151291
gene2941	10142.2	-1.87557	0.332805	-3.89287	9.91e-05	0.00155716
gene5251	504.272	-2.69579	0.544766	-3.88385	0.000102815	0.0016133
gene8331	14845.1	-2.37394	0.462302	-3.88046	0.000104259	0.00163316
gene236	178.067	-1.7308	0.296622	-3.8797	0.000104586	0.00163546
gene1693	29.3486	4.99787	1.13921	3.878	0.00010532	0.00164411
gene3753	11.0664	7.35871	1.75173	3.86972	0.00010896	0.00169802
gene7020	3674.35	1.32879	0.193999	3.85974	0.000113508	0.00176587
gene8906	37.9089	-2.25409	0.43381	-3.85903	0.000113839	0.001768
gene1165	157.794	-1.40234	0.213418	-3.85317	0.000116599	0.0017982
gene6631	1630.85	1.53189	0.24699	3.85398	0.000116215	0.0017982
gene6319	592.093	1.96762	0.360133	3.85307	0.000116647	0.0017982
gene10205	12969.4	2.23278	0.42898	3.85281	0.000116771	0.0017982
gene8281	6.76307	5.82617	1.3612	3.85406	0.000116174	0.0017982
gene7170	455.234	2.07007	0.38704	3.84992	0.000118155	0.00181644
gene9944	760.147	-1.41757	0.217621	-3.84873	0.000118733	0.00182224
gene4196	884.236	1.37112	0.205676	3.84645	0.000119839	0.00183613
gene7475	35.1199	-2.12776	0.403418	-3.83662	0.000124739	0.00190798
gene8348	37.73	-2.54333	0.512482	-3.83101	0.000127616	0.00194871
gene5248	185.871	-2.1942	0.421441	-3.83019	0.000128046	0.001952
gene2931	66.4478	-2.35174	0.463014	-3.82654	0.000129956	0.0019778
gene5191	106.742	-2.25048	0.436694	-3.8253	0.000130612	0.00198448
gene8920	571.295	1.34528	0.200262	3.82139	0.000132699	0.00201282
gene6529	11.7392	-3.94522	0.881641	-3.817	0.000135085	0.00204561
gene10219	46.2786	3.7759	0.837971	3.81386	0.000136814	0.00206835
gene8232	77.9757	6.8649	1.64833	3.81289	0.000137353	0.00207305
gene5484	2586.34	1.72987	0.301693	3.8114	0.000138181	0.0020821
gene6835	3329.68	3.91375	0.875072	3.80969	0.000139141	0.0020931
gene8444	63.4376	-2.48209	0.499951	-3.80456	0.000142058	0.00213345
gene4909	209.491	5.34748	1.25456	3.80012	0.000144627	0.00216845
gene7382	159.686	2.20853	0.428784	3.79801	0.000145862	0.00218337
gene8633	311.32	1.90672	0.349749	3.79336	0.000148624	0.00222106
gene8512	3083.41	-1.47515	0.236303	-3.78816	0.000151769	0.00226435
gene8120	166.847	-1.78406	0.31804	-3.78587	0.000153174	0.00228156
gene7201	524.931	2.99067	0.637423	3.7819	0.000155634	0.00231441
gene5857	737.794	2.67469	0.553934	3.78148	0.0001559	0.0023146
gene3724	775.099	-2.01022	0.378752	-3.77614	0.000159279	0.00236091
gene9031	35.6855	-2.07089	0.394972	-3.77467	0.00016022	0.00236811
gene7863	56.6764	2.0356	0.385635	3.77457	0.000160285	0.00236811
gene2548	1152.38	1.33829	0.200957	3.7734	0.000161036	0.00237535
gene4306	757.198	1.92819	0.35737	3.77254	0.000161593	0.00237971
gene6072	7628.69	-2.83415	0.598343	-3.76731	0.000165013	0.00242615
gene10094	11.3113	-3.2357	0.705613	-3.76368	0.000167431	0.00245773
gene1817	134.536	3.41855	0.75449	3.7622	0.000168424	0.00246832
gene2785	892.77	-1.71655	0.302383	-3.75865	0.000170834	0.00249962
gene1228	2644.45	1.20429	0.166333	3.75324	0.000174561	0.00255004
gene8566	3231.53	1.53633	0.25505	3.74959	0.000177126	0.00258337
gene6386	1450.97	-1.72435	0.305676	-3.74366	0.000181358	0.00264086
gene1194	382.24	-1.37224	0.211725	-3.74181	0.000182699	0.00265614
gene117	912.582	1.38799	0.215964	3.74131	0.000183061	0.00265716
gene2842	55.752	-1.81469	0.330358	-3.73741	0.000185925	0.00269442
gene7345	203.655	1.86488	0.344031	3.73479	0.000187875	0.00271837
gene691	532.62	1.64409	0.285021	3.73337	0.000188935	0.00272936
gene1687	144.215	1.81942	0.332352	3.72923	0.000192064	0.00277017
gene8261	19.8444	-2.70045	0.568694	-3.72864	0.000192517	0.0027723
gene8093	121.361	2.93024	0.630525	3.72743	0.000193444	0.00278125
gene6839	473.73	-1.43951	0.230638	-3.72665	0.00019404	0.00278542
gene8474	28.3899	-2.35259	0.475899	-3.72471	0.000195538	0.0027981
gene8610	2731.96	-2.35138	0.475541	-3.72497	0.00019534	0.0027981
gene58	1300.31	-1.34037	0.204426	-3.71953	0.000199597	0.0028517
gene625	639.171	-1.60631	0.27597	-3.7189	0.000200093	0.00285431
gene507	241.743	1.81518	0.332209	3.71808	0.000200745	0.00285912
gene3707	16.3464	-4.93497	1.17189	-3.7162	0.000202238	0.00287589
gene733	989	1.83035	0.336514	3.71559	0.000202729	0.00287838
gene751	801.073	2.03125	0.390874	3.71284	0.000204945	0.0029053
gene10301	4141.64	1.50566	0.249639	3.70799	0.000208909	0.00295689
gene9625	380.279	1.99474	0.381851	3.70495	0.00021143	0.00298762
gene1912	129.236	5.78482	1.40497	3.70459	0.000211737	0.00298762
gene7328	1884.49	1.33144	0.203087	3.70009	0.000215523	0.00303634
gene4831	18.8657	3.91069	0.901191	3.69587	0.000219132	0.00308241
gene1362	72.9355	-2.35091	0.479348	-3.69442	0.000220393	0.00309537
gene10393	2571.72	-2.39649	0.491784	-3.69368	0.000221034	0.00309959
gene1384	548.936	1.8193	0.335842	3.69012	0.000224146	0.00313356
gene9830	15.2854	3.83786	0.882843	3.69019	0.000224083	0.00313356
gene5561	277.769	2.08746	0.408892	3.68668	0.000227197	0.00317134
gene10394	545.13	-2.63444	0.558812	-3.67644	0.000236508	0.0032862
gene149	302.371	1.65306	0.291872	3.67648	0.00023647	0.0032862
gene4988	218.187	2.30353	0.468786	3.67659	0.000236376	0.0032862
gene5418	1018.42	-1.73612	0.314625	-3.67459	0.000238229	0.00329502
gene9011	97.6349	-1.48691	0.246784	-3.67492	0.000237926	0.00329502
gene10070	3516.92	1.81213	0.335277	3.67496	0.000237887	0.00329502
gene10158	18.6279	6.45976	1.60121	3.67208	0.000240583	0.00332254
gene3605	508.472	-1.85513	0.348214	-3.66191	0.000250345	0.0034521
gene7008	9270.73	1.44457	0.23629	3.65892	0.000253282	0.00348732
gene4424	610.73	1.09763	0.141564	3.65652	0.000255658	0.00351472
gene8163	92.5578	-1.90026	0.361328	-3.65392	0.000258268	0.00354524
gene5741	72.1546	-2.44065	0.509956	-3.64866	0.000263612	0.00361315
gene4896	84.849	-1.86696	0.352909	-3.64673	0.000265599	0.00363492
gene3812	1171.75	-1.69805	0.306946	-3.64249	0.000270015	0.00367875
gene2417	272.706	1.3076	0.199743	3.64266	0.000269839	0.00367875
gene3488	23.8379	2.85091	0.623427	3.64262	0.000269882	0.00367875
gene7689	100.246	-1.58378	0.275666	-3.64128	0.000271287	0.00369056
gene7520	27.5905	3.16626	0.710723	3.63891	0.000273794	0.00371851
gene2897	9.92584	6.07786	1.511	3.63857	0.000274159	0.00371851
gene8725	2899.08	-1.70317	0.308975	-3.63516	0.000277811	0.00376244
gene8529	693.029	-2.42462	0.507984	-3.63126	0.000282046	0.00381411
gene7167	693.386	3.96876	0.933438	3.6304	0.000282979	0.00382106
gene3532	891.897	-1.53922	0.264746	-3.62318	0.000291007	0.00392364
gene2285	11.608	-3.13712	0.705998	-3.62199	0.000292346	0.00393586
gene5249	39.8079	2.02431	0.398899	3.62074	0.000293757	0.00394902
gene9297	43.5125	3.29921	0.751541	3.61818	0.000296677	0.00398238
gene2477	178.5	-3.04413	0.681271	-3.61696	0.000298085	0.00399167
gene1700	2794.2	1.39248	0.224639	3.61682	0.000298246	0.00399167
gene2505	554.156	2.00607	0.394454	3.61529	0.000300007	0.00400935
gene10357	88.5199	-1.78517	0.333695	-3.6116	0.000304311	0.0040609
gene4244	85.3236	-1.80192	0.338658	-3.60812	0.000308426	0.00410978
gene3606	158.44	-2.8272	0.624582	-3.59792	0.000320769	0.00426801
gene1267	168.319	2.47722	0.528442	3.59021	0.000330416	0.00438995
gene227	4049.6	-2.97345	0.667784	-3.58417	0.000338158	0.00447973
gene7216	3380.66	1.44187	0.240442	3.58451	0.000337715	0.00447973
gene2764	1608.71	1.15824	0.161553	3.57922	0.000344618	0.00455868
gene1032	945.513	-1.31203	0.204562	-3.5785	0.000345572	0.00456466
gene7811	5733.52	-1.54892	0.271018	-3.57512	0.000350071	0.00461738
gene7209	90.977	-1.96106	0.386429	-3.57389	0.00035171	0.0046323
gene6088	5800.09	-2.09611	0.424478	-3.57171	0.000354663	0.0046577
gene4802	86.0407	-1.69765	0.312898	-3.57191	0.000354385	0.0046577
gene68	19.3521	-3.31017	0.764855	-3.56953	0.000357625	0.00468984
gene9284	462.234	-1.89379	0.369007	-3.56034	0.000370372	0.00485001
gene5832	272.591	2.2312	0.463888	3.55949	0.00037158	0.00485187
gene4195	199.199	2.36263	0.500801	3.55956	0.000371479	0.00485187
gene535	70.0924	-2.08014	0.421543	-3.55869	0.000372712	0.00485968
gene5735	94.7051	3.6828	0.872702	3.5554	0.000377409	0.00491387
gene5602	5369.4	-1.88056	0.365868	-3.55473	0.000378369	0.00491933
gene5544	573.899	1.51751	0.263862	3.55302	0.000380839	0.00494439
gene8509	321.95	-2.06846	0.419067	-3.55185	0.000382532	0.0049593
gene5069	172.744	1.79713	0.342784	3.55073	0.000384164	0.00497337
gene28	32.3349	-1.97922	0.394192	-3.5496	0.00038582	0.00498771
gene7574	11796.5	-1.66856	0.306913	-3.54682	0.000389916	0.00503351
gene1009	706.95	1.06794	0.137658	3.54456	0.00039327	0.00506314
gene7075	41.2626	2.33233	0.494377	3.54452	0.000393323	0.00506314
gene7804	189.555	-1.68616	0.312188	-3.54325	0.000395221	0.00508038
gene1723	12.0415	6.06037	1.54781	3.54073	0.000399022	0.005122
gene3587	741.99	-1.55351	0.275273	-3.53654	0.000405401	0.00519655
gene7082	990.689	2.51347	0.547787	3.52961	0.000416176	0.00532717
gene6910	1042.42	1.33336	0.213493	3.52871	0.000417594	0.00533782
gene1127	493.7	-1.5509	0.275745	-3.52101	0.000429899	0.00548739
gene5338	2484.13	-1.66395	0.308106	-3.51811	0.000434639	0.00553238
gene5582	1000.57	-1.32083	0.210574	-3.51816	0.000434556	0.00553238
gene9260	1460.36	1.5495	0.275615	3.51758	0.000435499	0.00553558
gene3151	9805.99	-1.30105	0.205128	-3.51512	0.000439557	0.00557594
gene8180	520.47	2.41203	0.521217	3.51491	0.000439899	0.00557594
gene6990	921.848	1.77991	0.342853	3.49979	0.000465621	0.00589377
gene7322	28.7483	3.0834	0.7155	3.49882	0.000467325	0.00590712
gene6761	6309.62	-1.32961	0.21451	-3.49451	0.000474941	0.00599507
gene3602	171.105	-1.66803	0.31139	-3.4941	0.00047566	0.00599581
gene4567	213.23	-1.46408	0.253232	-3.49119	0.000480878	0.00605321
gene9158	541.084	-2.54439	0.562828	-3.49022	0.000482621	0.00606676
gene6129	1188.65	-1.64537	0.30529	-3.48969	0.00048359	0.00607056
gene5374	199.059	-1.57105	0.284047	-3.48905	0.000484732	0.00607651
gene4843	67.7523	1.80479	0.351109	3.48835	0.000486017	0.00608424
gene6427	77.5812	-1.6216	0.298815	-3.48577	0.000490721	0.00613469
gene399	687.857	1.61042	0.29565	3.48527	0.000491643	0.00613778
gene2533	502.292	-1.23849	0.189143	-3.48145	0.000498708	0.00621746
gene8846	1289.33	1.29883	0.206642	3.4786	0.000504041	0.00627535
gene5514	89.9715	-1.72238	0.32864	-3.47608	0.000508797	0.00632591
gene6940	5592.65	1.52915	0.273286	3.4731	0.000514481	0.00638785
gene1074	281.403	-1.75423	0.338331	-3.47065	0.000519193	0.00643757
gene9267	1766.01	-1.38476	0.231914	-3.47009	0.000520287	0.00644235
gene3097	562.234	-1.56786	0.284837	-3.46817	0.000524008	0.00647279
gene596	600.136	-1.41757	0.241506	-3.46809	0.000524168	0.00647279
gene2111	1393.28	1.48298	0.260623	3.46471	0.000530794	0.00654574
gene1183	225.856	2.24578	0.48201	3.45589	0.000548475	0.00675462
gene3615	30.8859	-2.25688	0.485429	-3.45444	0.000551447	0.00678205
gene4133	2299.6	1.41059	0.240794	3.44937	0.000561887	0.00690113
gene4089	95.3226	1.53266	0.276558	3.44471	0.000571664	0.00701174
gene3957	13448.6	-1.92129	0.389493	-3.44367	0.000573869	0.00702932
gene2537	17380.1	1.38657	0.234378	3.44132	0.00057889	0.00708129
gene9232	227.603	-1.85751	0.371407	-3.43965	0.000582456	0.00711535
gene4033	642.317	1.47979	0.261878	3.43593	0.00059053	0.0072043
gene8893	362.583	-2.00497	0.414921	-3.43431	0.000594072	0.00723782
gene10115	371.737	-1.30728	0.212152	-3.42811	0.000607788	0.00739502
gene757	1277.42	1.65502	0.313782	3.426	0.000612534	0.00744282
gene5625	195.479	1.33795	0.221298	3.42504	0.000614699	0.00745916
gene861	872.321	1.56831	0.288984	3.41995	0.000626332	0.00759021
gene6277	962.664	1.90691	0.388185	3.41825	0.000630248	0.00762751
gene10222	2901.98	-1.89368	0.384555	-3.4161	0.000635256	0.00766772
gene793	201.834	1.93268	0.395961	3.41621	0.000635004	0.00766772
gene5987	48.3624	3.6854	0.909598	3.41404	0.000640082	0.00771574
gene9400	720.113	1.3243	0.218131	3.41217	0.000644479	0.00775847
gene10242	9.41761	-5.27896	1.37823	-3.4094	0.000651049	0.00782721
gene3469	65.0812	2.69086	0.619622	3.4067	0.000657545	0.00789488
gene5112	13589.4	-1.56251	0.289123	-3.39825	0.000678192	0.00813205
gene8162	362.317	-1.21644	0.187369	-3.39674	0.000681936	0.0081497
gene9059	104.197	1.71514	0.334183	3.39677	0.000681861	0.0081497
gene5897	3872.28	1.74527	0.343071	3.39657	0.000682351	0.0081497
gene5867	151.354	-1.57344	0.292559	-3.39568	0.000684595	0.00816579
gene9252	185.106	-1.9122	0.392373	-3.39524	0.00068569	0.00816815
gene3398	44.7246	-1.8732	0.381497	-3.3898	0.000699431	0.00831052
gene2149	140.088	1.87566	0.382225	3.38979	0.000699468	0.00831052
gene2135	901.36	1.90104	0.390294	3.38474	0.000712468	0.00845394
gene4841	99.3228	1.54621	0.285495	3.38432	0.000713539	0.00845563
gene2031	1460.1	1.33838	0.224282	3.38138	0.000721229	0.00853564
gene5386	532.612	-1.21711	0.188479	-3.38027	0.000724144	0.008559
gene3196	234.156	-1.80893	0.363655	-3.37939	0.000726464	0.00857339
gene2176	12753.8	1.62373	0.308877	3.3791	0.000727245	0.00857339
gene13	66.7564	-2.03125	0.42959	-3.37822	0.000729569	0.00858966
gene2898	5.38723	5.80706	1.54777	3.37715	0.000732403	0.00861189
gene5748	759.113	-1.68662	0.327767	-3.37625	0.000734799	0.00862892
gene3218	151.24	-1.37404	0.235366	-3.37364	0.00074182	0.00870014
gene1724	24.4278	3.37385	0.82871	3.37132	0.000748087	0.00876234
gene7306	29070.4	-2.40354	0.541044	-3.37041	0.000750569	0.00878012
gene1406	2966.93	1.52602	0.280848	3.36843	0.000755974	0.00883199
gene1976	1076.74	1.28853	0.210601	3.36434	0.000767281	0.00895259
gene469	280.363	-1.2321	0.193857	-3.36382	0.00076872	0.0089579
gene1768	218.792	1.43144	0.25398	3.35238	0.000801192	0.00932436
gene8240	2489.65	1.28323	0.209998	3.34876	0.000811746	0.00943513
gene8615	6573.92	1.52102	0.282513	3.33088	0.000865704	0.0100494
gene9066	1365.99	-1.56594	0.29619	-3.32875	0.000872371	0.0101139
gene6311	587.829	-1.48533	0.272226	-3.32567	0.000882075	0.0102134
gene5332	72.1631	-1.6308	0.316136	-3.32387	0.000887761	0.0102662
gene9092	150.078	2.15505	0.474064	3.32245	0.000892302	0.0103056
gene8142	5.70676	-5.72055	1.55066	-3.31507	0.000916218	0.0105684
gene8291	13.162	3.72258	0.948485	3.31327	0.000922131	0.0106232
gene9120	269.567	-1.26688	0.207362	-3.31249	0.000924711	0.0106394
gene8022	50925.3	-1.56488	0.297436	-3.31123	0.000928861	0.0106737
gene6171	866.056	1.83484	0.37984	3.30359	0.000954542	0.010955
gene3806	761.483	1.3627	0.237125	3.30079	0.000964115	0.0110509
gene5875	149.272	-1.5364	0.289878	-3.29932	0.000969201	0.0110813
gene1828	37.3325	2.78945	0.669602	3.29965	0.000968051	0.0110813
gene6269	497.01	1.10515	0.159203	3.29864	0.000971536	0.011094
gene5150	73.0145	-2.08576	0.456585	-3.29787	0.000974204	0.0111106
gene7402	352.547	-2.12712	0.469634	-3.29431	0.000986641	0.0112383
gene8931	40.4952	1.84279	0.384105	3.28761	0.00101042	0.0114948
gene2349	2944.38	-1.43813	0.261105	-3.28655	0.00101422	0.0115237
gene781	901.735	1.21276	0.192693	3.28377	0.00102429	0.0116235
gene9000	414.591	-1.75096	0.356719	-3.28258	0.00102861	0.011658
gene4933	85.3804	2.57788	0.608937	3.28094	0.00103463	0.0117117
gene542	7119.31	1.57026	0.302218	3.27663	0.00105054	0.0118769
gene4734	2258.59	-1.57206	0.303015	-3.27394	0.00106058	0.0119756
gene10163	1449.93	1.53779	0.292664	3.27268	0.00106534	0.0120144
gene5207	1310.52	1.53918	0.293788	3.26486	0.00109516	0.0123355
gene2227	536.673	1.3878	0.24767	3.26158	0.00110792	0.0124638
gene3418	245.423	-1.71849	0.349301	-3.25934	0.0011167	0.012547
gene9098	9540.87	-1.36104	0.240141	-3.25242	0.00114425	0.0128408
gene426	1473.95	-1.34739	0.236028	-3.25126	0.00114896	0.0128777
gene2531	30553.7	-1.21798	0.196321	-3.24968	0.00115537	0.0129336
gene8135	5939.2	-1.94583	0.420546	-3.24777	0.00116315	0.0130047
gene6799	55.5824	1.90926	0.410072	3.24153	0.00118889	0.0132762
gene5030	82.9891	-1.59827	0.31418	-3.24103	0.00119098	0.0132832
gene2779	8629.42	-1.97669	0.431352	-3.23793	0.00120399	0.0134119
gene9580	6.50623	-3.9943	1.05569	-3.23419	0.00121988	0.0135557
gene10193	10567.3	-1.24484	0.205557	-3.23436	0.00121917	0.0135557
gene7880	2133.33	-1.61967	0.321791	-3.23089	0.00123404	0.0136964
gene10153	70.6974	-2.73721	0.669114	-3.22398	0.00126424	0.0140144
gene5419	225.921	-1.54271	0.298744	-3.22252	0.00127069	0.0140688
gene1867	178.19	1.72122	0.354212	3.22184	0.00127371	0.0140851
gene7604	1912.46	0.954238	0.116173	3.22137	0.0012758	0.0140911
gene3017	3118.8	-1.3278	0.232368	-3.21817	0.00129011	0.0142318
gene7691	2333.19	1.51424	0.290515	3.21581	0.00130078	0.0143322
gene1878	15.0558	-2.85769	0.709211	-3.21158	0.00132007	0.0145272
gene8675	552.938	2.26603	0.525066	3.21109	0.00132232	0.0145344
gene2205	347.14	4.66167	1.27136	3.21048	0.00132512	0.0145476
gene8651	85.5794	2.41547	0.572363	3.20683	0.00134206	0.0147158
gene2195	409.928	1.67943	0.342932	3.20596	0.00134614	0.0147427
gene2500	762.097	-2.3771	0.560709	-3.20506	0.00135037	0.0147712
gene6318	20.4955	2.38552	0.563531	3.20394	0.00135562	0.014811
gene7873	108.985	1.41853	0.261814	3.20278	0.00136106	0.0148525
gene6087	5575.66	-2.0509	0.459596	-3.20043	0.00137224	0.0149388
gene5813	2180.52	-1.34723	0.239718	-3.20056	0.0013716	0.0149388
gene3763	12791.5	-1.30727	0.227401	-3.19816	0.00138307	0.0150386
gene3460	256.693	-2.30172	0.538414	-3.19776	0.001385	0.0150417
gene5689	11.2204	5.66852	1.5927	3.1949	0.00139877	0.0151731
gene2449	45.9964	-1.95402	0.4304	-3.19243	0.00141084	0.0152857
gene7117	2376.87	2.00969	0.44867	3.1865	0.00144005	0.0155837
gene3158	1843.6	1.46875	0.279162	3.18364	0.00145435	0.0157197
gene3429	182.49	2.91604	0.734734	3.17944	0.00147562	0.0159308
gene9434	15494.2	-1.31422	0.231211	-3.17554	0.00149559	0.0161081
gene7131	1126.73	1.20336	0.196292	3.17568	0.00149487	0.0161081
gene4965	32.9694	-2.12171	0.485651	-3.17453	0.00150081	0.0161453
gene5214	15634.4	-1.20923	0.198335	-3.17256	0.00151101	0.0162358
gene2612	56.6375	1.90726	0.418678	3.17012	0.00152378	0.0163537
gene9135	25.1025	2.32019	0.549234	3.1684	0.00153278	0.0164309
gene6685	511.765	1.18659	0.192034	3.15875	0.00158445	0.0169648
gene9856	136.483	1.967	0.439252	3.15763	0.00159056	0.0170102
gene2922	100.245	-1.8888	0.414575	-3.15698	0.00159415	0.0170286
gene1884	338.745	-1.74505	0.369083	-3.1566	0.00159622	0.0170307
gene7928	253.482	2.27873	0.539267	3.15007	0.00163231	0.0173954
gene114	3169.9	1.27371	0.220424	3.14716	0.00164867	0.01754
gene4285	88.1985	1.98908	0.447759	3.14697	0.00164974	0.01754
gene899	32309.8	-1.26142	0.216666	-3.14504	0.00166066	0.0176355
gene6102	34.016	-1.74269	0.36978	-3.14427	0.00166502	0.0176613
gene524	727.802	1.32282	0.23651	3.14075	0.00168518	0.0178543
gene4279	8175.04	-1.08272	0.160149	-3.13906	0.00169492	0.0179366
gene5266	809.966	1.53824	0.305323	3.13844	0.00169851	0.0179537
gene3422	472.04	-2.10927	0.488039	-3.13351	0.00172728	0.0182366
gene7038	14.3098	-2.38336	0.575756	-3.13217	0.0017352	0.018299
gene2463	10.8147	-3.50017	0.932561	-3.13135	0.00174006	0.0183291
gene9651	327.057	2.0905	0.482833	3.12841	0.00175756	0.018492
gene1691	152.721	2.54896	0.630152	3.12459	0.00178055	0.0187122
gene3586	46.1069	-2.44394	0.597329	-3.12046	0.00180571	0.0189547
gene1382	705.289	1.27308	0.222179	3.11946	0.00181181	0.0189968
gene120	133.927	1.92889	0.432742	3.11707	0.00182659	0.0191298
gene9504	9.3373	-4.20149	1.16289	-3.1142	0.00184444	0.0192781
gene8017	470.586	1.74641	0.374557	3.11411	0.00184499	0.0192781
gene1969	16.7915	4.84769	1.37067	3.11357	0.00184841	0.0192917
gene1414	46.3531	-2.35145	0.569119	-3.11262	0.00185436	0.0193316
gene4538	20526.2	-1.2928	0.229291	-3.1087	0.00187911	0.0195673
gene6294	217.715	-1.41928	0.270109	-3.10718	0.00188879	0.0196455
gene4421	305.727	-1.46614	0.285403	-3.10487	0.00190365	0.0197775
gene7486	5504.46	-1.68577	0.356603	-3.10085	0.00192968	0.0200252
gene45	135.9	-1.33524	0.243602	-3.10031	0.00193316	0.0200384
gene5927	727.487	1.06739	0.15732	3.09808	0.00194777	0.0201669
gene4049	3093.48	1.28487	0.227568	3.09741	0.00195221	0.0201898
gene4987	96.9381	1.79433	0.3923	3.09541	0.00196543	0.0203035
gene3580	65.632	-1.92651	0.435104	-3.09467	0.00197029	0.0203307
gene2725	317.837	1.59216	0.327121	3.09415	0.00197381	0.0203438
gene4866	225.573	-1.35532	0.25091	-3.09004	0.0020013	0.0206039
gene2455	41.6041	-1.96846	0.449492	-3.08895	0.00200867	0.0206564
gene2964	1934.8	1.26201	0.22105	3.08531	0.00203339	0.020887
gene6921	15885.9	-1.30677	0.235734	-3.08303	0.00204905	0.0210242
gene7086	96.1974	-1.35407	0.251441	-3.07853	0.00208026	0.0213203
gene8756	2354.64	1.49848	0.298475	3.07723	0.00208937	0.0213896
gene4945	1271.69	-1.22669	0.210197	-3.0766	0.00209379	0.0214107
gene4733	868.31	-1.31881	0.240323	-3.07423	0.00211043	0.0215567
gene3819	163.658	-2.07293	0.485892	-3.07254	0.00212242	0.0216549
gene8410	556.788	1.02762	0.145727	3.07165	0.00212877	0.0216954
gene4890	1673.83	-1.34211	0.248355	-3.06864	0.00215032	0.0218905
gene10238	406.605	-1.89328	0.428326	-3.06608	0.00216885	0.0220544
gene5580	813.531	2.02556	0.471787	3.06401	0.00218394	0.0221831
gene1020	18422.6	1.48604	0.29592	3.06179	0.00220017	0.0223231
gene4660	757.94	-1.97846	0.457506	-3.0567	0.00223792	0.0226807
gene700	24228.5	1.4001	0.268742	3.05165	0.00227591	0.0230401
gene154	692.491	-1.50954	0.304695	-3.05072	0.00228294	0.0230856
gene8333	25.0347	-1.90706	0.435134	-3.04977	0.00229014	0.0231327
gene9486	3104.14	1.44194	0.282718	3.04876	0.00229786	0.023185
gene3861	44303.3	-1.32614	0.244801	-3.04794	0.00230416	0.0232227
gene6607	162.61	1.51504	0.306992	3.0458	0.00232063	0.0233629
gene4109	16.8849	-2.17477	0.523849	-3.04433	0.00233198	0.0234512
gene884	767.849	-1.75898	0.38807	-3.03807	0.00238098	0.0239175
gene6134	346.069	-1.15509	0.189417	-3.03611	0.00239648	0.0240467
gene7695	3709.84	1.34454	0.251849	3.03572	0.00239965	0.024052
gene5343	734.776	1.0977	0.170818	3.03072	0.00243972	0.0244267
gene3302	110.046	-1.44761	0.286647	-3.02674	0.00247206	0.0246726
gene5371	211.409	-1.44104	0.284481	-3.0267	0.00247241	0.0246726
gene6783	3862.43	1.18939	0.201324	3.02694	0.00247044	0.0246726
gene7736	17.1132	-2.12044	0.50927	-3.0248	0.002488	0.0247871
gene6027	186.649	2.45221	0.618989	3.02464	0.00248933	0.0247871
gene3443	9121.65	-1.41761	0.277017	-3.02367	0.00249729	0.0248337
gene9630	1314.45	1.20103	0.205408	3.02341	0.00249947	0.0248337
gene332	47.9928	-1.53756	0.317011	-3.02059	0.00252279	0.0250381
gene6474	135.535	-3.09834	0.833945	-3.01979	0.00252946	0.0250496
gene2644	671.956	1.26267	0.22604	3.02011	0.0025268	0.0250496
gene4517	1043.37	1.25444	0.22352	3.01738	0.00254972	0.0252229
gene3043	3029.03	1.31036	0.242145	3.01621	0.00255958	0.0252928
gene8303	353.942	1.68104	0.365134	3.01543	0.00256613	0.0253301
gene1504	53.5175	-1.91735	0.44423	-3.01049	0.00260824	0.0257179
gene88	670.109	2.65627	0.6901	3.00866	0.00262405	0.0258458
gene445	12.5385	2.66277	0.692923	3.00578	0.00264901	0.0260634
gene9652	43.0464	2.44873	0.622325	3.00283	0.00267486	0.0262893
gene3361	16.0607	-2.49889	0.639425	-3.00097	0.00269124	0.0264218
gene7658	511.79	-1.55203	0.324011	-2.99999	0.00269987	0.0264779
gene8056	83.05	2.14451	0.521641	2.99921	0.00270685	0.0265178
gene3595	21.2539	-2.18068	0.534853	-2.99275	0.00276472	0.0270496
gene6712	7.97015	3.23685	0.887837	2.99249	0.00276708	0.0270496
gene965	860.872	-1.0811	0.16761	-2.98964	0.00279305	0.0272742
gene3742	251.327	-1.12682	0.182961	-2.98875	0.0028012	0.0273245
gene5584	95.8519	-2.10986	0.512383	-2.98578	0.00282854	0.0275617
gene353	25452.8	-1.44581	0.290086	-2.98465	0.00283901	0.0276341
gene2026	5639.2	-1.0166	0.14633	-2.98365	0.00284831	0.0276949
gene412	1116	1.40326	0.276322	2.97936	0.00288848	0.0280555
gene5690	491.052	2.44712	0.628103	2.97263	0.00295262	0.028648
gene278	131.884	1.57768	0.336423	2.96556	0.00302135	0.0292836
gene7421	490.983	1.19954	0.208951	2.96502	0.00302667	0.0293039
gene8719	223.964	-1.16748	0.198175	-2.96443	0.00303241	0.0293283
gene6618	704.578	-1.54503	0.325791	-2.9621	0.00305544	0.0295197
gene3510	11.764	-2.75769	0.735509	-2.96079	0.00306848	0.0296007
gene1226	2058.29	-1.47803	0.303349	-2.96039	0.00307254	0.0296007
gene7534	24.3006	2.21009	0.550655	2.96028	0.00307359	0.0296007
gene2481	31.6267	2.39242	0.612647	2.95835	0.00309295	0.0297557
gene1071	32771.1	-1.19668	0.208587	-2.95644	0.00311211	0.0299085
gene7169	145.031	-1.27844	0.236324	-2.95545	0.0031221	0.0299728
gene3533	106.531	1.37496	0.269038	2.95484	0.00312827	0.0300004
gene2496	711.188	-1.0829	0.170354	-2.95209	0.00315635	0.0302379
gene1005	1040.93	1.44851	0.294413	2.94997	0.00317804	0.0304136
gene109	154.999	-1.73797	0.392786	-2.94809	0.00319748	0.0305676
gene3570	31.8319	-2.39131	0.614523	-2.9475	0.00320354	0.0305933
gene6705	93.9501	1.46899	0.301745	2.94616	0.00321744	0.0306939
gene1782	1405.71	1.92569	0.456942	2.94498	0.00322971	0.0307786
gene2465	58.9554	-1.94156	0.463049	-2.94041	0.00327775	0.0312038
gene8189	145.821	-3.82586	1.10418	-2.93961	0.00328625	0.031252
gene1042	282.277	1.26014	0.231638	2.93624	0.0033222	0.0315609
gene6493	481.505	3.59887	1.02967	2.93189	0.00336906	0.0319727
gene2952	16.4229	-2.09998	0.518569	-2.93111	0.0033775	0.0320194
gene7400	1555.13	1.04314	0.158084	2.92973	0.0033926	0.0321291
gene5486	301.731	1.54074	0.328118	2.92805	0.00341098	0.0322361
gene5986	44.5883	3.13705	0.873224	2.92829	0.00340836	0.0322361
gene1497	867.372	-1.15218	0.195959	-2.9199	0.00350147	0.033057
gene4052	534.779	1.23762	0.225471	2.91666	0.00353803	0.0333674
gene442	624.537	1.38371	0.275654	2.91565	0.00354952	0.0334412
gene9317	10.1564	-2.96979	0.820292	-2.91334	0.00357585	0.0336306
gene2491	436.193	1.519	0.322322	2.91324	0.00357702	0.0336306
gene9225	14.9029	-2.66428	0.715559	-2.9128	0.00358208	0.0336435
gene140	13940.9	1.60262	0.351172	2.91202	0.00359099	0.0336923
gene8051	154.835	-2.40762	0.627824	-2.91104	0.00360231	0.0337324
gene5719	1310.72	1.47001	0.30574	2.91101	0.00360267	0.0337324
gene2453	32605.2	-1.2578	0.23288	-2.91052	0.00360832	0.0337506
gene6	1029.97	3.3669	0.957749	2.90984	0.00361611	0.0337887
gene7524	12.2126	-2.48967	0.657316	-2.90525	0.00366954	0.0342177
gene1920	3534.89	1.28338	0.242088	2.90548	0.00366696	0.0342177
gene7113	28.9765	-2.01812	0.495445	-2.90269	0.00369977	0.0344643
gene6609	10.6326	3.98967	1.17524	2.90126	0.00371667	0.0345863
gene9866	52.3743	-1.79011	0.417216	-2.90044	0.00372637	0.0346411
gene704	1386.99	1.27979	0.241403	2.89884	0.00374548	0.0347833
gene9343	133.189	2.10434	0.52622	2.89678	0.00377018	0.034977
gene6606	331.6	1.24318	0.229084	2.89492	0.00379261	0.0351492
gene9882	825.342	1.02893	0.155164	2.89324	0.00381286	0.035301
gene2290	20.7128	2.28992	0.591184	2.89237	0.00382346	0.0353631
gene4031	255.091	-1.45738	0.303502	-2.89084	0.00384215	0.0354999
gene10156	136.26	-1.34498	0.264787	-2.88904	0.00386417	0.0356671
gene1647	802.147	-1.42791	0.293847	-2.88554	0.00390747	0.0360303
gene10006	54.5046	1.86236	0.444486	2.88504	0.00391367	0.0360509
gene2717	46.6456	-1.50683	0.321332	-2.88433	0.00392242	0.036095
gene3797	839.257	-1.52237	0.326884	-2.88288	0.00394052	0.036225
gene3291	436.631	-1.89012	0.455496	-2.87625	0.00402426	0.0369574
gene6061	77.0568	1.38517	0.279991	2.87571	0.00403119	0.0369838
gene9205	111.407	1.60241	0.355832	2.87329	0.00406226	0.0372313
gene5809	2450.21	1.58907	0.351264	2.87268	0.00407004	0.0372576
gene3467	68.165	1.96646	0.48268	2.87243	0.00407333	0.0372576
gene4642	50032.7	-1.21788	0.222233	-2.87031	0.00410065	0.0374699
gene5268	54.1613	2.70074	0.739236	2.86883	0.00411988	0.0376079
gene9824	22926.3	-1.28312	0.245314	-2.8662	0.00415428	0.0378839
gene4237	2215.25	1.26866	0.240479	2.86368	0.00418746	0.0381482
gene6207	641.404	-1.82545	0.434974	-2.86328	0.00419275	0.0381582
gene6231	320.228	4.21668	1.27184	2.85939	0.00424458	0.0385913
gene1304	13817.8	-1.22912	0.227284	-2.85601	0.00429007	0.038966
gene2124	454.972	-1.82203	0.434983	-2.85535	0.00429894	0.0390077
gene5336	227.381	-1.52042	0.329401	-2.85494	0.00430456	0.0390197
gene3404	2.58306	-5.08959	1.58085	-2.85264	0.00433574	0.0392633
gene9233	288.571	1.6656	0.381196	2.84789	0.00440106	0.0398078
gene8384	843.256	1.85424	0.447474	2.84763	0.00440463	0.0398078
gene8975	226.891	-1.25702	0.237778	-2.84728	0.00440945	0.0398119
gene3461	22.9757	-2.57698	0.701624	-2.84623	0.00442402	0.0398644
gene186	186.535	1.21802	0.224155	2.84634	0.00442252	0.0398644
gene2850	3.15744	-5.16763	1.61292	-2.84431	0.00445081	0.0400661
gene2982	158.952	-1.32093	0.260565	-2.84354	0.00446155	0.0401231
gene5337	1587.6	1.31959	0.260176	2.84266	0.00447393	0.0401947
gene2231	52.8064	2.70383	0.747216	2.84232	0.00447859	0.0401969
gene2232	5.77506	4.63471	1.42836	2.83871	0.00452964	0.0406151
gene8915	102.796	-1.43795	0.302325	-2.83784	0.00454192	0.0406851
gene9029	5.48386	-3.79665	1.13364	-2.83746	0.00454746	0.0406946
gene6490	166.706	2.41498	0.646868	2.83671	0.00455808	0.0407496
gene2005	87.4134	1.52057	0.331898	2.8339	0.00459839	0.0410696
gene5571	1105.48	1.11161	0.187624	2.8334	0.00460561	0.0410938
gene10319	634.384	-1.5494	0.342488	-2.83047	0.00464803	0.0414316
gene8143	40.6617	-1.68063	0.388922	-2.82996	0.00465538	0.0414566
gene92	195.93	-1.39701	0.28893	-2.82772	0.00468811	0.0417072
gene2087	25.122	1.76664	0.420365	2.82289	0.00475932	0.0422994
gene9900	64.2141	1.55584	0.345743	2.82245	0.00476582	0.0423158
gene230	52225.5	-1.13896	0.198136	-2.82111	0.00478575	0.0424513
gene4173	360.049	-1.10824	0.187296	-2.82035	0.00479715	0.0425111
gene9594	92.1214	1.8972	0.467104	2.81992	0.00480355	0.0425263
gene9264	118.627	-1.29527	0.254018	-2.81583	0.00486512	0.0430296
gene6232	122.512	1.88921	0.465214	2.81422	0.00488962	0.0432043
gene5198	451.147	-1.85257	0.452673	-2.81123	0.00493523	0.043565
gene3863	3.79794	-4.78942	1.4985	-2.80908	0.0049683	0.0438145
gene3408	134.008	-1.62521	0.372265	-2.80769	0.00498975	0.043961
gene9606	3050.88	-1.3468	0.27322	-2.80654	0.00500773	0.0440635
gene10215	103.942	2.63365	0.731796	2.80632	0.00501107	0.0440635
gene4489	349.098	1.39892	0.291953	2.80498	0.00503203	0.0442051
gene71	27.3027	-2.93355	0.840358	-2.80065	0.00509998	0.0447589
gene7982	4833.84	-1.56076	0.350392	-2.79905	0.00512535	0.0449382
gene2935	262.746	-1.34318	0.272907	-2.79648	0.00516623	0.045253
gene9573	15.7631	2.63504	0.734971	2.79609	0.00517256	0.0452649
gene9449	5.44302	5.05672	1.60255	2.7935	0.00521418	0.0455853
gene4903	995.571	5.05312	1.60173	2.79267	0.00522746	0.0456575
gene4680	45.36	1.66718	0.390235	2.78597	0.00533671	0.046567
gene8871	29.8336	3.93524	1.20515	2.78408	0.00536805	0.0467956
gene2140	80.056	-1.53971	0.344826	-2.78316	0.0053832	0.0468437
gene5954	672.912	1.4088	0.297795	2.78312	0.00538386	0.0468437
gene5616	76.5506	-1.61224	0.371011	-2.78225	0.00539841	0.0469254
gene5026	485.542	1.22029	0.230373	2.77934	0.00544689	0.0473017
gene3265	80.2373	-2.64069	0.741865	-2.77772	0.00547425	0.0474939
gene3030	1249.54	0.95726	0.135931	2.77538	0.00551369	0.0477906
gene9494	2958.63	1.2732	0.249848	2.7745	0.00552872	0.0478752
gene3229	29.1349	-1.65287	0.386782	-2.77383	0.00554	0.0479273
gene6454	18.3345	-2.52225	0.700694	-2.7719	0.00557304	0.0481673
gene1470	504.281	-1.53185	0.34362	-2.77006	0.0056046	0.0483942
gene2748	374.528	2.21312	0.589691	2.76945	0.00561507	0.0484386
gene9435	223.83	-1.21029	0.227733	-2.76768	0.00564572	0.0486569
gene8371	3499.86	-1.30022	0.260314	-2.76675	0.00566186	0.0487473
gene10322	476.605	-1.1011	0.188383	-2.76615	0.00567228	0.0487473
gene10053	1074.19	1.41808	0.302964	2.76628	0.00566994	0.0487473
gene7785	1240.68	1.6333	0.380829	2.7658	0.00567835	0.0487535
gene2159	1990.08	-1.19555	0.222636	-2.76482	0.00569536	0.0488535
gene3446	6371.98	-1.37142	0.286328	-2.76403	0.00570927	0.0489267
gene1434	53.7158	-1.5936	0.367143	-2.76078	0.00576629	0.0493224
gene8147	125.275	-1.38747	0.29245	-2.76105	0.00576163	0.0493224
gene7188	7.47835	5.81885	1.89923	2.75841	0.00580829	0.049635
gene4696	69.0304	-2.14485	0.567811	-2.75593	0.0058525	0.0499658
gene2291	428.281	1.21701	0.231475	2.75197	0.00592376	0.0505269
gene1077	4301.3	1.27007	0.251117	2.748	0.00599598	0.0510828
gene4908	4402.54	5.02153	1.61641	2.74777	0.00600016	0.0510828
gene8772	178.578	-1.14496	0.205687	-2.74671	0.0060197	0.0511534
gene5096	20.9552	2.15636	0.573909	2.74671	0.0060196	0.0511534
gene8834	44687.6	-1.15175	0.20826	-2.74535	0.00604457	0.0513168
gene3658	7.24759	-4.37268	1.38237	-2.74361	0.00607671	0.0515416
gene4026	187.579	1.54307	0.351527	2.73966	0.00615023	0.0521166
gene832	6988.79	-1.54038	0.350929	-2.73668	0.00620633	0.0524942
gene8664	19.915	1.9921	0.515989	2.73668	0.00620626	0.0524942
gene8144	5.99378	-3.85317	1.19717	-2.73408	0.00625545	0.0528606
gene4735	1152.9	-2.28737	0.624907	-2.7322	0.00629126	0.0531139
gene5349	12.5136	-2.24377	0.609196	-2.73109	0.00631244	0.0532433
gene947	3939.27	1.31793	0.270569	2.72734	0.00638481	0.0538038
gene7219	16.9482	-2.18757	0.589759	-2.72581	0.00641441	0.0538881
gene4377	570.952	-1.16462	0.214499	-2.72552	0.00642008	0.0538881
gene9878	15224.1	-1.05233	0.17326	-2.72613	0.00640819	0.0538881
gene2016	1436.62	1.0271	0.164056	2.72529	0.00642442	0.0538881
gene10	531.008	1.63013	0.385276	2.72565	0.00641758	0.0538881
gene1224	1176.68	1.13087	0.202159	2.72493	0.00643145	0.0538975
gene2673	2.45293	-4.88724	1.58195	-2.72275	0.0064741	0.054205
gene3619	221.447	-1.58906	0.370944	-2.72025	0.00652334	0.054567
gene6858	119.621	-1.3002	0.265359	-2.71408	0.00664605	0.0555425
gene99	3092.81	1.53841	0.353533	2.71094	0.00670921	0.0560188
gene4154	40.3891	-1.91561	0.492978	-2.70928	0.00674293	0.0562262
gene10263	902.79	-1.14356	0.208025	-2.70911	0.0067464	0.0562262
gene6264	3.89622	4.6299	1.49823	2.70312	0.00686917	0.057197
gene9875	16491.6	-0.998375	0.154794	-2.70279	0.00687604	0.0572019
gene7780	17.3872	-2.12553	0.57214	-2.70132	0.00690651	0.0574029
gene3226	256.805	-1.6633	0.401157	-2.70043	0.00692489	0.0575032
gene3822	3013.37	1.29291	0.264147	2.69892	0.00695656	0.0577135
gene6523	21.7034	1.91316	0.494589	2.6955	0.00702836	0.058256
gene8400	34815.3	-1.1558	0.213708	-2.69434	0.00705287	0.058406
gene8092	31.7179	-2.2573	0.623174	-2.69155	0.00711216	0.0587367
gene1573	87644.4	-1.42434	0.313699	-2.69156	0.00711193	0.0587367
gene7715	697.635	-1.14118	0.208476	-2.69183	0.00710616	0.0587367
gene226	8.22349	-2.98553	0.894153	-2.69029	0.00713899	0.0587996
gene5015	3598.7	1.36156	0.290512	2.69028	0.00713917	0.0587996
gene1595	28.7608	1.97212	0.517376	2.69073	0.00712966	0.0587996
gene8198	21.2059	-2.6244	0.760006	-2.68998	0.00714567	0.0587999
gene8026	8581.83	-1.17495	0.22133	-2.68808	0.00718651	0.0590826
gene8769	5830.14	-1.09729	0.192465	-2.68769	0.0071949	0.0590981
gene6429	56.5324	-1.45276	0.324806	-2.68703	0.00720914	0.0591617
gene6569	77248.5	-1.93048	0.502699	-2.68645	0.00722153	0.0592101
gene102	3739.13	-1.4317	0.317337	-2.6839	0.00727694	0.0596107
gene10350	136.006	-1.64577	0.397337	-2.68228	0.00731222	0.0598458
gene7052	362.146	-1.27384	0.258962	-2.6793	0.00737766	0.0603271
gene9562	5.38232	-3.58335	1.12123	-2.67863	0.00739238	0.0603582
gene9937	1383.03	0.955807	0.140304	2.67852	0.00739472	0.0603582
gene2710	33051.8	-1.21405	0.2368	-2.67759	0.00741529	0.0604718
gene10005	514.545	1.21259	0.236339	2.67663	0.00743665	0.0605917
gene335	221.939	1.36498	0.293824	2.67158	0.00754948	0.061456
gene2234	25798.4	-1.2205	0.239786	-2.67111	0.00756008	0.0614873
gene2398	7.17051	5.62607	1.89068	2.66891	0.00760971	0.0618357
gene4117	296.799	-1.28547	0.264957	-2.66259	0.00775424	0.0627301
gene4474	2461.26	-1.15225	0.21484	-2.66361	0.00773072	0.0627301
gene894	513.219	1.20101	0.233206	2.66292	0.00774657	0.0627301
gene8077	325.236	1.42721	0.318185	2.66262	0.00775338	0.0627301
gene8293	22.0719	3.95501	1.26719	2.66339	0.00773582	0.0627301
gene3975	11.7639	2.59443	0.757595	2.65898	0.00783782	0.0632937
gene5433	10.1937	2.8376	0.848979	2.65919	0.00783282	0.0632937
gene9004	258.437	1.27636	0.262032	2.65753	0.00787166	0.0635106
gene6756	156.159	1.12542	0.205353	2.656	0.00790745	0.0637413
gene6070	1945.61	1.34327	0.287409	2.65571	0.00791426	0.0637413
gene7100	437.256	1.4418	0.324592	2.65502	0.00793029	0.063814
gene9755	715873	-1.10477	0.197726	-2.65403	0.00795366	0.0639455
gene7324	28.4748	2.80435	0.838715	2.65209	0.00799955	0.0642576
gene8203	86.4833	1.43075	0.32095	2.65073	0.00803175	0.0644594
gene1681	34.849	-1.7705	0.449721	-2.64719	0.00811637	0.0650238
gene9602	156.676	1.31887	0.279084	2.64749	0.00810925	0.0650238
gene2315	32.899	2.94411	0.893238	2.64668	0.00812871	0.0650655
gene7575	35109.5	-1.26224	0.257802	-2.64635	0.00813645	0.0650701
gene3608	5209.87	-1.82382	0.470223	-2.64518	0.00816475	0.0652392
gene8323	43.4455	2.2922	0.647386	2.64479	0.00817423	0.0652576
gene1577	19.8089	-1.94284	0.515822	-2.64207	0.00824017	0.0656762
gene239	218.28	-1.69662	0.422686	-2.64173	0.00824831	0.0656762
gene4122	407.887	-1.52886	0.35916	-2.6419	0.0082443	0.0656762
gene4967	237.666	-1.52706	0.358605	-2.64097	0.008267	0.0657674
gene4348	295.12	1.40526	0.31278	2.63847	0.00832821	0.0661388
gene98	225.408	1.69589	0.422907	2.63863	0.00832429	0.0661388
gene5119	1503.66	3.50233	1.10852	2.63624	0.00838295	0.0665155
gene10223	242.384	-1.53104	0.361228	-2.6328	0.00846851	0.0671358
gene5107	30.2479	2.85554	0.864582	2.63195	0.00848963	0.0672447
gene826	38.201	1.6168	0.394541	2.62786	0.00859239	0.0679994
gene1935	119.294	1.29361	0.271746	2.62603	0.00863874	0.0683069
gene7039	3037.88	1.24763	0.254363	2.62471	0.00867228	0.0685125
gene5866	1604.65	0.942732	0.13824	2.62394	0.00869194	0.0686082
gene6475	57.0793	-3.25376	1.02036	-2.62041	0.00878237	0.069262
gene3416	2.79817	-4.92407	1.65837	-2.61948	0.00880649	0.0693921
gene1719	74.4969	-1.68727	0.423003	-2.61763	0.0088543	0.0696177
gene913	2588.29	1.2029	0.237977	2.61748	0.00885807	0.0696177
gene6730	72.1181	2.67137	0.798942	2.61768	0.00885307	0.0696177
gene3590	3190.09	-1.66516	0.414954	-2.61513	0.00891923	0.0700379
gene7494	100.623	-1.23916	0.252148	-2.61419	0.00894394	0.0701713
gene9218	16.36	-2.2985	0.657576	-2.61339	0.00896481	0.0702745
gene10089	123.074	-1.58422	0.384336	-2.61288	0.0089783	0.0702956
gene4882	889.331	-1.11401	0.20439	-2.6127	0.00898295	0.0702956
gene3298	2.99203	-5.26402	1.79368	-2.6114	0.00901713	0.0705025
gene5368	212.803	1.42167	0.322636	2.60874	0.00908771	0.0709934
gene3337	46219.7	-1.18958	0.233821	-2.60705	0.0091325	0.0712377
gene1184	969.756	1.24373	0.254597	2.60697	0.00913465	0.0712377
gene3777	33.263	-1.90048	0.507409	-2.60239	0.00925754	0.0720738
gene828	30.6493	2.30953	0.664592	2.60239	0.0092577	0.0720738
gene8102	13.0578	-2.93475	0.905201	-2.60136	0.00928557	0.072229
gene56	75.0366	-2.58013	0.769179	-2.60035	0.00931289	0.0723179
gene7148	27.9962	-2.4669	0.725559	-2.60061	0.00930571	0.0723179
gene3628	22.7693	-2.20473	0.624889	-2.60003	0.00932144	0.0723226
gene5247	37.1453	-1.49577	0.352871	-2.5952	0.00945372	0.0732241
gene5978	284.515	1.34317	0.294039	2.59545	0.00944667	0.0732241
gene5868	1228.47	-1.67668	0.423118	-2.59189	0.00954501	0.0738683
gene2820	6.78988	-3.57287	1.15585	-2.58933	0.00961622	0.074293
gene6399	331.385	-1.46523	0.341852	-2.5895	0.00961148	0.074293
gene7083	1258.54	1.08509	0.195145	2.58826	0.00964614	0.0743979
gene2578	1697.51	1.27332	0.267849	2.58847	0.00964045	0.0743979
gene1834	812.003	1.41588	0.323211	2.58618	0.00970462	0.0747855
gene3739	8.08006	-2.74491	0.837746	-2.5842	0.00976042	0.0751519
gene5751	125.998	1.55203	0.376195	2.58384	0.00977069	0.0751674
gene4452	2100.72	1.16265	0.22555	2.58323	0.0097879	0.0752362
gene9656	53690.3	-1.1352	0.215071	-2.58147	0.0098381	0.0754946
gene7121	2717.63	0.903281	0.125218	2.58173	0.00983055	0.0754946
gene1155	10.4173	-3.15154	0.996886	-2.57957	0.00989233	0.0758467
gene4166	1781.37	-1.38355	0.31187	-2.57656	0.00997877	0.0763548
gene4113	365.468	-1.25371	0.261492	-2.57639	0.00998376	0.0763548
gene10271	101.587	1.37899	0.310074	2.57678	0.00997245	0.0763548
gene10119	107.347	-1.36768	0.30608	-2.57344	0.0100693	0.0769441
gene8993	3156.39	-1.68244	0.42887	-2.57057	0.0101532	0.07752
gene3634	147.591	-2.45487	0.730194	-2.56763	0.0102395	0.0780484
gene8429	31.1795	1.74416	0.453396	2.56764	0.0102394	0.0780484
gene6247	16.3413	-2.48731	0.743094	-2.56672	0.0102666	0.0781897
gene7024	2000.15	-1.01714	0.170462	-2.56441	0.0103351	0.0785794
gene3676	81.1359	1.51205	0.363422	2.56464	0.0103282	0.0785794
gene863	50913.6	-1.15977	0.226377	-2.56107	0.0104351	0.0792739
gene9508	4.95012	-4.4082	1.49768	-2.55609	0.0105855	0.0803495
gene6075	646.296	-2.01747	0.562979	-2.55333	0.0106698	0.0809166
gene3776	429.18	-1.12338	0.212835	-2.55306	0.010678	0.0809166
gene2218	15.2799	6.01692	2.13065	2.55176	0.010718	0.0811521
gene8302	50.3991	1.66841	0.426727	2.5506	0.0107539	0.0813556
gene8361	358.671	-1.13797	0.218844	-2.54964	0.0107836	0.0815127
gene4002	10748.3	-1.18538	0.237683	-2.54701	0.0108649	0.0820595
gene4844	27.3519	2.06161	0.582223	2.54474	0.0109358	0.0825264
gene5562	142.491	2.00491	0.560057	2.54422	0.0109522	0.0825815
gene3870	7534.64	1.13165	0.217122	2.54075	0.0110616	0.0833373
gene1972	83.8501	-2.01263	0.563982	-2.5402	0.0110788	0.0833981
gene6428	583.633	1.18117	0.236884	2.53781	0.011155	0.0839019
gene3216	168.423	-1.29989	0.283748	-2.53707	0.0111784	0.0840087
gene2532	126.766	-1.25001	0.264175	-2.53624	0.0112049	0.0841388
gene3770	14.841	2.38148	0.711391	2.53233	0.0113306	0.085012
gene4340	260.709	1.39022	0.320067	2.53142	0.0113602	0.0851637
gene9483	305.261	1.71604	0.449378	2.52802	0.0114707	0.085922
gene4838	779.029	2.28776	0.675776	2.52711	0.0115004	0.0860735
gene9007	175.856	1.71177	0.448389	2.52409	0.0115998	0.0867458
gene8123	4.58533	-3.72144	1.24592	-2.52137	0.0116899	0.0871941
gene4165	566.216	-1.45167	0.345722	-2.52131	0.0116919	0.0871941
gene9812	479.909	-1.2589	0.269241	-2.52152	0.0116849	0.0871941
gene4302	65.5604	2.23031	0.654592	2.52112	0.0116981	0.0871941
gene2393	289.71	1.2625	0.270911	2.51926	0.0117602	0.0875858
gene3483	197.082	1.51509	0.371475	2.51724	0.0118278	0.0880173
gene4322	73.5611	-1.37546	0.316194	-2.51573	0.0118787	0.0883235
gene7435	715.412	1.49511	0.363853	2.51505	0.0119017	0.0884223
gene5039	352.754	-2.00145	0.565364	-2.51421	0.0119299	0.0885595
gene10331	494.662	1.28421	0.280129	2.51388	0.0119412	0.0885716
gene4562	29523.4	-1.10252	0.207984	-2.51233	0.0119937	0.0888881
gene1748	850.072	-1.60164	0.407095	-2.50958	0.0120876	0.0895109
gene7178	574.983	-1.70216	0.44737	-2.50835	0.0121297	0.0896458
gene8145	43016.3	-1.07852	0.198757	-2.50818	0.0121353	0.0896458
gene6763	303.023	-1.0375	0.182384	-2.50844	0.0121264	0.0896458
gene1982	493.449	-1.08307	0.20064	-2.50732	0.0121649	0.0897641
gene6321	64.3952	1.78683	0.481357	2.50713	0.0121715	0.0897641
gene4911	12474.5	4.03393	1.37779	2.50686	0.0121809	0.0897641
gene10342	14.2223	-2.17116	0.634931	-2.50604	0.0122092	0.0898998
gene7422	831.744	-1.13232	0.220439	-2.50555	0.0122263	0.0899526
gene2721	352.471	-1.68815	0.442514	-2.50422	0.0122722	0.0902173
gene4941	5220.5	1.14837	0.227096	2.50277	0.0123225	0.0904943
gene9781	10.9054	2.29711	0.68614	2.50256	0.0123297	0.0904943
gene1897	212.426	1.29096	0.284362	2.50019	0.0124128	0.0910303
gene7972	157.884	-1.34207	0.304918	-2.49927	0.012445	0.0911932
gene6309	468.82	-3.07844	0.999886	-2.49873	0.012464	0.0912592
gene8304	3441.01	2.73849	0.864415	2.49705	0.012523	0.0916173
gene1992	2644.47	1.77437	0.478542	2.49585	0.0125656	0.0918551
gene4825	24.712	-2.71614	0.85615	-2.49505	0.0125938	0.0919135
gene3637	70.2052	4.83146	1.70383	2.49525	0.012587	0.0919135
gene9784	262.647	-1.4357	0.343489	-2.49119	0.0127315	0.0928441
gene464	1384.74	-2.00684	0.572909	-2.49051	0.0127561	0.0929487
gene1246	222.49	-1.61017	0.413689	-2.49021	0.0127669	0.0929534
gene2450	3.62892	-3.74021	1.27183	-2.48477	0.0129636	0.0943103
gene654	37978.3	-1.10283	0.21058	-2.48283	0.0130344	0.0947489
gene3682	20.6079	2.01442	0.578427	2.47987	0.013143	0.0953865
gene6307	121.717	2.08632	0.607408	2.47991	0.0131415	0.0953865
gene6550	64252.1	-1.18941	0.245846	-2.47884	0.013181	0.0955856
gene6541	15243.1	-1.87582	0.523587	-2.47488	0.0133279	0.0965745
gene3631	50.0011	2.55735	0.799099	2.47447	0.0133433	0.0966091
gene7950	6843.27	-1.24791	0.270072	-2.47309	0.0133949	0.0968051
gene7568	378.149	1.32967	0.303131	2.47309	0.0133949	0.0968051
gene4906	4918.46	3.78379	1.29556	2.4729	0.0134023	0.0968051
gene302	554.48	-1.22107	0.259509	-2.47032	0.0134993	0.0974283
gene8185	151.75	-3.92389	1.35414	-2.46939	0.0135344	0.097604
gene8476	379.097	-1.71534	0.45997	-2.4683	0.0135757	0.0978243
gene2428	365.89	-1.87563	0.525102	-2.46738	0.0136104	0.097997
gene2327	4564.67	1.31994	0.299978	2.46666	0.0136381	0.0981191
gene1122	407.456	-1.17146	0.239903	-2.46539	0.0136862	0.0983873
gene10247	9.24098	-3.17331	1.0522	-2.46465	0.0137148	0.098515
gene6591	8.92582	3.00122	0.982631	2.46401	0.0137391	0.0986119
gene7787	206.491	1.27305	0.281378	2.46305	0.0137762	0.0988003
gene6371	353.862	-1.05263	0.191943	-2.46235	0.0138029	0.0989135
gene4904	1233.53	4.0372	1.40549	2.45977	0.0139025	0.099549
gene1820	330.285	1.65165	0.43604	2.45768	0.0139837	0.100052
gene3758	8.68132	-2.905	0.946353	-2.4568	0.0140181	0.100062
gene7865	392.892	-1.35651	0.316031	-2.45708	0.0140072	0.100062
gene9385	28.1944	2.10771	0.621747	2.45713	0.0140052	0.100062
gene5977	4033.94	-1.10229	0.212628	-2.45636	0.0140351	0.100105
gene9195	11.7824	-2.30195	0.701598	-2.45433	0.0141149	0.100595
gene3441	27.3263	-2.24714	0.67944	-2.4537	0.0141393	0.10069
gene1553	4326.79	-1.40299	0.335663	-2.45184	0.0142129	0.101135
gene710	1155.86	1.02355	0.180942	2.45133	0.0142327	0.101197
gene5723	537.481	1.15568	0.234931	2.45044	0.0142681	0.10137
gene3273	15.0185	-1.93941	0.555307	-2.44803	0.0143639	0.10197
gene4682	199.712	-1.10645	0.215091	-2.44756	0.0143827	0.102024
gene7563	114.564	1.77486	0.48851	2.44593	0.014448	0.102408
gene7547	966.48	1.0199	0.179926	2.44489	0.0144895	0.102622
gene6329	694.695	1.02209	0.180975	2.44284	0.0145723	0.103128
gene7924	28.8117	1.70391	0.460263	2.44188	0.0146108	0.10332
gene4085	432.582	1.05339	0.193905	2.44134	0.0146329	0.103385
gene2442	26.0459	1.7256	0.469297	2.4411	0.0146427	0.103385
gene10214	399.771	1.84135	0.516957	2.43996	0.0146889	0.103631
gene6210	20989.1	-1.16955	0.241703	-2.43916	0.0147216	0.103711
gene7065	2794.36	1.01817	0.179643	2.43912	0.014723	0.103711
gene10246	4.68325	-4.30229	1.52662	-2.43826	0.0147582	0.103798
gene9228	24.3063	1.78916	0.495879	2.43842	0.0147516	0.103798
gene9986	702.962	1.10604	0.215795	2.43767	0.0147824	0.103808
gene8793	855.626	1.17509	0.244102	2.43786	0.0147744	0.103808
gene6915	348.799	-1.18369	0.247828	-2.4359	0.0148546	0.104234
gene2844	936.832	-0.964802	0.158071	-2.43436	0.014918	0.104599
gene251	15.1124	2.18209	0.658301	2.43368	0.0149462	0.104716
gene3668	4.55087	-4.1565	1.47081	-2.43165	0.0150303	0.105223
gene8297	132.027	1.42061	0.345812	2.43082	0.0150646	0.105348
gene5146	92.2179	3.20504	1.07997	2.43066	0.0150712	0.105348
gene3370	58.5693	-1.40503	0.339526	-2.42994	0.0151011	0.105476
gene6703	3173.94	-1.38564	0.331695	-2.42885	0.0151468	0.105714
gene5356	826.949	-1.15088	0.235089	-2.42837	0.015167	0.10573
gene298	807.431	0.962544	0.15754	2.42824	0.0151723	0.10573
gene7881	16.3951	-1.94783	0.564249	-2.42416	0.0153438	0.106843
gene4905	742.44	4.22595	1.50428	2.42371	0.0153627	0.106893
gene6537	457.822	1.82118	0.51266	2.42106	0.0154752	0.107594
gene7833	5.11966	-3.46334	1.19219	-2.41852	0.0155837	0.108265
gene9627	151.686	-1.63782	0.437605	-2.41729	0.0156365	0.108549
gene6279	1016.62	1.50917	0.384796	2.4147	0.0157483	0.109242
gene775	1592.6	1.14146	0.232585	2.41398	0.0157793	0.109374
gene8351	1789.01	-1.76776	0.492198	-2.41317	0.0158144	0.10945
gene9845	170.713	1.15356	0.237679	2.41318	0.0158139	0.10945
gene6814	470.829	1.20998	0.261564	2.4085	0.0160182	0.110776
gene3617	35.5828	-1.77617	0.497647	-2.40365	0.0162324	0.112172
gene864	15540.8	-1.07163	0.204583	-2.40308	0.0162574	0.11226
gene9544	375.004	-1.16801	0.244759	-2.40241	0.0162872	0.112381
gene8928	32.5082	-1.70892	0.470276	-2.40054	0.0163709	0.112841
gene2985	33073.7	-1.20807	0.261687	-2.40009	0.0163911	0.112841
gene5850	30.0922	1.64567	0.444012	2.40009	0.0163911	0.112841
gene9049	60.1654	2.60943	0.845797	2.39942	0.0164209	0.11296
gene6093	30.0233	-1.7139	0.473225	-2.39612	0.0165697	0.113812
gene2489	113.356	1.23602	0.273786	2.39612	0.0165697	0.113812
gene127	3.92164	4.4458	1.61378	2.39549	0.016598	0.11392
gene6869	7.62499	3.29914	1.13556	2.39454	0.0166411	0.11413
gene9159	163.52	1.86109	0.535137	2.39395	0.016668	0.114228
gene989	5.71588	-3.39566	1.17698	-2.39227	0.0167447	0.114668
gene2664	241.717	1.98339	0.587689	2.38797	0.0169415	0.115928
gene1407	20428	-1.30771	0.304833	-2.38724	0.0169753	0.11601
gene4177	626.437	-1.13132	0.230977	-2.38689	0.0169917	0.11601
gene5529	4933.62	1.21888	0.267644	2.38705	0.016984	0.11601
gene3403	325.52	-1.21434	0.265991	-2.3848	0.0170882	0.116582
gene3431	1141.56	-1.43486	0.358761	-2.38282	0.0171806	0.117124
gene1690	189.638	1.70098	0.470716	2.38144	0.0172453	0.117477
gene2146	697.585	1.14215	0.236195	2.38001	0.0173119	0.117843
gene1471	38628.6	-1.16937	0.247722	-2.37917	0.0173519	0.118026
gene9096	69.2351	-1.64367	0.447503	-2.37691	0.0174585	0.118663
gene8954	49.5874	1.49177	0.384128	2.37362	0.0176146	0.119635
gene7027	729.773	0.908944	0.138606	2.37322	0.0176337	0.119675
gene6931	415.085	1.21498	0.267678	2.37218	0.0176835	0.119924
gene1988	401.573	-1.69499	0.47063	-2.36914	0.0178296	0.120825
gene7338	52155.3	-1.13221	0.233173	-2.36823	0.0178733	0.12103
gene8583	122.495	1.13468	0.234357	2.36683	0.017941	0.121399
gene511	1253.5	1.4671	0.374925	2.36609	0.0179773	0.121463
gene3698	35.6644	1.88208	0.550293	2.36616	0.0179735	0.121463
gene181	12331	1.05287	0.200319	2.3606	0.0182456	0.123185
gene8334	12.7123	-2.12442	0.654408	-2.36002	0.0182738	0.123284
gene7511	90.2417	1.24369	0.281377	2.35873	0.0183378	0.123624
gene2456	36.3747	-3.80588	1.36783	-2.35839	0.0183543	0.123644
gene10333	3.57677	-4.28216	1.57038	-2.35749	0.018399	0.123853
gene975	2186.63	-1.716	0.48207	-2.35651	0.0184477	0.123998
gene3876	3887.9	1.13475	0.2354	2.35665	0.0184405	0.123998
gene512	318.369	1.11991	0.229145	2.3562	0.0184628	0.124007
gene1523	141.645	-1.53614	0.405991	-2.35508	0.0185185	0.12429
gene657	31.9575	-1.50045	0.390907	-2.35466	0.0185399	0.124341
gene5549	263.581	1.83997	0.535294	2.35379	0.0185833	0.124449
gene9310	11.335	2.60749	0.86137	2.3538	0.0185828	0.124449
gene7941	7.36328	3.68591	1.32043	2.35219	0.018663	0.124891
gene4582	231.465	-1.20771	0.26694	-2.35149	0.0186986	0.125036
gene2858	281.819	-1.08264	0.213778	-2.35122	0.0187122	0.125036
gene70	74.0167	-2.58503	0.853255	-2.34986	0.0187803	0.1254
gene718	960.166	1.02357	0.188827	2.34911	0.0188185	0.125562
gene5324	36.02	-1.87202	0.550261	-2.34801	0.0188741	0.125841
gene9391	20.0722	2.20415	0.692315	2.34597	0.0189777	0.126439
gene6608	6.90223	-2.59346	0.859402	-2.34286	0.0191367	0.127293
gene3031	14.7033	-2.3116	0.739159	-2.34265	0.0191471	0.127293
gene400	12.6937	2.87442	0.979416	2.34264	0.0191478	0.127293
gene275	2174.17	-1.49099	0.388927	-2.34232	0.0191642	0.127309
gene4900	1328.1	1.95627	0.587699	2.34179	0.0191913	0.127396
gene5154	193.04	-2.28034	0.726198	-2.34142	0.0192104	0.12743
gene4953	226.153	1.44767	0.37102	2.3386	0.0193561	0.128303
gene209	1251.17	1.25284	0.287953	2.33665	0.0194575	0.128881
gene8485	4274.39	-1.58125	0.428893	-2.33449	0.0195702	0.129428
gene7859	96.9585	-1.23381	0.280053	-2.33459	0.019565	0.129428
gene3076	32316.8	-1.09431	0.220334	-2.33425	0.0195827	0.129428
gene10207	2469.89	2.00202	0.609279	2.33393	0.0195992	0.129443
gene462	28.5677	-1.56732	0.423152	-2.33326	0.0196345	0.129582
gene6054	161.689	1.768	0.509466	2.33184	0.0197089	0.129978
gene3759	29120.5	-1.14698	0.243241	-2.33092	0.0197575	0.130205
gene6332	219.317	-1.99207	0.606277	-2.32908	0.0198546	0.13075
gene7398	142.116	-1.06928	0.210209	-2.32761	0.019933	0.131171
gene3195	607.74	-1.30857	0.313148	-2.32659	0.0199872	0.131433
gene7076	65447	-1.0983	0.222925	-2.32501	0.0200714	0.131797
gene2647	22.9703	2.74981	0.93315	2.32526	0.0200583	0.131797
gene4152	74.5679	-1.75013	0.503564	-2.3237	0.0201415	0.132161
gene10038	1264.98	1.14476	0.243084	2.32333	0.0201612	0.132195
gene783	9709.19	-1.22809	0.27957	-2.31817	0.0204398	0.133926
gene9787	277.877	1.1597	0.250445	2.31469	0.0206299	0.135074
gene7909	726.969	-1.50943	0.402152	-2.31116	0.0208243	0.136249
gene862	301.626	-1.19212	0.264921	-2.31059	0.0208553	0.136354
gene3224	31.3934	-1.48539	0.391988	-2.30974	0.0209027	0.136565
gene6065	7.81329	2.35499	0.769799	2.30578	0.0211231	0.137906
gene7700	62.4913	-1.2763	0.302151	-2.30449	0.0211949	0.138276
gene10216	11.1839	2.71132	0.92504	2.30403	0.0212208	0.138346
gene4829	3921.14	-1.67923	0.478268	-2.29836	0.0215413	0.140334
gene7812	1057.43	1.07462	0.215408	2.29622	0.0216635	0.14103
gene9113	2.51932	-4.5753	1.74243	-2.29295	0.0218509	0.142148
gene4336	7974.99	-3.00179	1.05634	-2.29263	0.0218693	0.142166
gene3453	79.4533	1.63035	0.458315	2.29176	0.0219192	0.142389
gene8765	247.863	-1.29682	0.313517	-2.2864	0.0222309	0.144311
gene8608	802.752	-1.01798	0.19166	-2.28516	0.0223034	0.144678
gene7136	738.126	1.14248	0.246269	2.284	0.0223715	0.14481
gene10186	112.709	1.6235	0.456826	2.28424	0.0223572	0.14481
gene5937	76.2871	1.98068	0.613115	2.28453	0.0223403	0.14481
gene9645	204.454	-1.31279	0.321254	-2.28101	0.0225477	0.145744
gene656	1462.34	-1.25641	0.296515	-2.2812	0.0225364	0.145744
gene1208	79.6979	-2.08874	0.661703	-2.28009	0.0226022	0.145992
gene6048	29.0047	1.99099	0.61936	2.27815	0.0227177	0.146634
gene8896	11.3748	1.96124	0.607394	2.27405	0.022963	0.148112
gene651	11205.5	-1.09562	0.226772	-2.27372	0.0229831	0.148137
gene10204	769.287	1.58664	0.442893	2.27288	0.0230336	0.148357
gene2839	3268.29	-0.935427	0.156462	-2.27165	0.0231075	0.148728
gene4092	325.682	-1.15021	0.251308	-2.26896	0.023271	0.149463
gene6558	57.7023	1.92818	0.594105	2.26926	0.0232524	0.149463
gene9586	43.3986	2.05698	0.650947	2.26897	0.0232702	0.149463
gene7754	430.318	1.28509	0.310907	2.26785	0.0233386	0.149792
gene5413	3495.46	-1.37115	0.349188	-2.26569	0.0234706	0.150487
gene7464	2185.01	1.34081	0.335818	2.26553	0.0234801	0.150487
gene1900	572.071	1.11471	0.236532	2.26063	0.0237824	0.152318
gene9502	81.7288	1.28457	0.311843	2.25937	0.0238605	0.15271
gene5093	9143.89	-1.37799	0.353463	-2.25763	0.0239687	0.153295
gene8721	22.5906	-1.79895	0.540267	-2.25621	0.0240575	0.153755
gene3103	7262.53	-1.05998	0.212973	-2.25371	0.0242146	0.154651
gene5121	9458.93	1.80081	0.541799	2.25325	0.0242435	0.154726
gene7057	205.522	-1.02603	0.197988	-2.25281	0.0242713	0.154795
gene3373	1484.92	1.41653	0.37146	2.25201	0.0243214	0.154992
gene7497	565.287	2.10385	0.676731	2.25178	0.0243362	0.154992
gene7447	778.232	-1.25997	0.302473	-2.24803	0.0245743	0.156399
gene6521	23.1634	1.84518	0.563033	2.24709	0.0246345	0.156672
gene2584	3.7062	-3.71561	1.39644	-2.24543	0.0247407	0.157238
gene6280	2.60715	4.1372	1.58447	2.24504	0.0247654	0.157285
gene8947	123.941	-1.22865	0.289455	-2.24093	0.0250308	0.15886
gene2253	1098.05	-1.07479	0.220889	-2.24	0.0250909	0.159125
gene8900	497.508	1.90043	0.589544	2.23974	0.0251075	0.159125
gene8955	667.997	1.59854	0.455186	2.23763	0.0252449	0.159884
gene6039	48.2009	-1.4675	0.396838	-2.23643	0.0253239	0.160273
gene4379	2002.41	-1.29058	0.317997	-2.23457	0.0254459	0.160821
gene7969	181.889	1.14665	0.253557	2.23478	0.0254317	0.160821
gene2889	270.777	-1.14932	0.25542	-2.22897	0.0258157	0.162938
gene10090	78.1162	1.55758	0.438579	2.22896	0.0258165	0.162938
gene9093	12.541	2.15969	0.709143	2.22761	0.0259067	0.163393
gene10218	22.5775	2.58319	0.899541	2.2269	0.0259537	0.163577
gene3235	5.43105	3.82581	1.45896	2.22474	0.0260985	0.164375
gene8358	577.412	-1.05009	0.211367	-2.22403	0.0261466	0.164564
gene3537	2284.61	1.26835	0.309718	2.22249	0.0262501	0.165102
gene5711	1177.54	-1.25346	0.303126	-2.22171	0.0263031	0.165321
gene6495	24.5832	-4.09329	1.58266	-2.21986	0.0264282	0.165992
gene2691	9.50836	-2.45921	0.84709	-2.21843	0.0265258	0.166491
gene3168	2.04187	-4.37803	1.7155	-2.21395	0.0268322	0.168298
gene2028	2350.14	1.39135	0.366588	2.21326	0.0268796	0.168479
gene1119	1819.93	1.17216	0.267624	2.21267	0.0269202	0.168617
gene3476	760.837	-1.39199	0.367124	-2.21175	0.0269839	0.1689
gene1094	3889.65	-1.05623	0.215354	-2.21137	0.0270099	0.168946
gene4646	31.1044	-1.44097	0.389391	-2.21106	0.0270316	0.168966
gene3207	256.788	-1.82442	0.563359	-2.20893	0.0271793	0.169697
gene1640	2.50091	4.19674	1.63739	2.20884	0.0271859	0.169697
gene3223	11.5613	-1.92124	0.60769	-2.20711	0.0273063	0.170216
gene1620	923.942	1.17241	0.268388	2.20728	0.0272946	0.170216
gene202	99.0064	-1.62731	0.476361	-2.19856	0.0279091	0.173854
gene5224	3.46508	3.96072	1.53813	2.19794	0.0279533	0.17401
gene1970	6.49693	-2.42444	0.841147	-2.19277	0.028324	0.176197
gene8718	69.5008	-1.45219	0.398168	-2.1905	0.0284878	0.177096
gene3639	21.499	2.30793	0.789053	2.18987	0.0285334	0.177258
gene7375	3.42657	4.38194	1.73916	2.18609	0.0288094	0.17885
gene5158	690.848	-1.32936	0.343033	-2.18451	0.0289248	0.179321
gene5034	719.865	1.03172	0.206782	2.18451	0.0289246	0.179321
gene5138	4933.39	1.11406	0.244505	2.18424	0.0289443	0.179321
gene4230	5.29727	2.91528	1.06934	2.18386	0.0289729	0.179376
gene133	358.175	1.54333	0.441541	2.18174	0.0291285	0.180217
gene3950	379.328	0.975642	0.181446	2.18049	0.0292209	0.180543
gene4851	3809.6	1.27456	0.318525	2.18057	0.0292154	0.180543
gene8497	198.701	1.11718	0.246417	2.17997	0.0292598	0.180561
gene3694	72.6185	1.4523	0.400151	2.17992	0.0292635	0.180561
gene3565	7.9645	-3.45063	1.31769	-2.17852	0.0293672	0.181078
gene4366	44.8672	-1.44665	0.398067	-2.17716	0.0294689	0.181582
gene4106	4652.63	0.998874	0.192429	2.17677	0.029498	0.181583
gene8375	69.3789	1.48939	0.417799	2.17662	0.0295091	0.181583
gene2223	405.95	0.942884	0.166756	2.17614	0.029545	0.181674
gene9307	51.0179	1.45138	0.400473	2.17589	0.0295637	0.181674
gene10155	34.4535	2.40821	0.840379	2.17546	0.0295958	0.181748
gene3255	4.27611	3.44972	1.31959	2.17471	0.0296521	0.181971
gene3511	18.656	-1.62647	0.481529	-2.17322	0.0297636	0.182533
gene3178	474.02	1.41548	0.384651	2.17204	0.0298528	0.182956
gene6534	147.88	-1.86337	0.591217	-2.17073	0.0299513	0.183437
gene4977	6.1308	-2.98525	1.11154	-2.1639	0.0304724	0.186502
gene4328	20404.5	-1.11555	0.247752	-2.16165	0.0306448	0.187432
gene3077	884.694	0.931433	0.162958	2.15659	0.0310377	0.189707
gene8059	6.15569	-3.38153	1.30123	-2.15299	0.0313194	0.191266
gene433	1238.67	1.1721	0.27504	2.15279	0.0313348	0.191266
gene694	54.688	-1.36071	0.362759	-2.15214	0.0313866	0.191454
gene6239	570.156	-1.2657	0.318787	-2.15096	0.0314792	0.19189
gene6517	698.407	1.19224	0.284898	2.14897	0.0316366	0.192721
gene6704	323.634	-1.47697	0.417511	-2.14837	0.0316842	0.192796
gene9204	13.2616	3.20004	1.2196	2.14828	0.0316914	0.192796
gene3618	229.432	-1.35256	0.359784	-2.14728	0.0317708	0.193021
gene2076	11812	1.12374	0.253209	2.14739	0.031762	0.193021
gene7922	1783.29	-1.24565	0.31007	-2.14676	0.0318126	0.193146
gene3503	79.3628	1.30684	0.339036	2.14384	0.0320457	0.194432
gene1296	3.29466	-3.60517	1.41148	-2.14327	0.0320917	0.194452
gene2219	18.4328	5.54455	2.31629	2.14332	0.032087	0.194452
gene9828	4706.95	-1.78374	0.561725	-2.14293	0.0321184	0.194484
gene1741	164.397	-1.05079	0.219993	-2.14003	0.0323527	0.195773
gene9060	268.348	1.26742	0.321754	2.13647	0.0326414	0.197388
gene9798	106.112	-1.26497	0.321032	-2.13367	0.0328702	0.19864
gene4235	940.791	-1.1287	0.25726	-2.13287	0.0329354	0.198779
gene5122	7497.03	2.80756	1.0444	2.13285	0.0329368	0.198779
gene5504	1310.98	-1.07481	0.232289	-2.13015	0.0331592	0.199988
gene1344	23062.8	-1.02896	0.210853	-2.12925	0.0332336	0.200304
gene7433	46478.6	-1.10342	0.246126	-2.12662	0.0334513	0.201254
gene6848	496.296	-1.0876	0.238728	-2.12628	0.0334797	0.201254
gene6628	260.207	1.49734	0.431397	2.12645	0.0334658	0.201254
gene2022	3.33189	3.69072	1.46281	2.12654	0.0334585	0.201254
gene9149	12.0115	-2.54776	0.926301	-2.12432	0.0336436	0.202106
gene3738	44.8681	2.01668	0.676945	2.1223	0.0338127	0.202854
gene2562	3.7232	3.31369	1.288	2.12243	0.0338019	0.202854
gene3659	2.76162	-4.71791	1.95064	-2.12131	0.0338957	0.203218
gene5905	4156.35	-1.43256	0.402169	-2.1199	0.0340147	0.203797
gene5638	19.0156	1.7538	0.55398	2.11885	0.0341032	0.204193
gene7233	4.31697	3.57603	1.41427	2.11843	0.0341385	0.20427
gene1276	19301.3	-1.14202	0.265492	-2.1169	0.0342684	0.204912
gene8570	1839.77	0.866553	0.135423	2.11599	0.0343458	0.20524
gene376	27.9657	-1.46368	0.417764	-2.11527	0.0344069	0.205471
gene3378	41.7215	2.39328	0.857342	2.115	0.0344297	0.205472
gene3316	641.989	-1.83532	0.59371	-2.11437	0.0344838	0.20566
gene5887	1678.81	-1.10345	0.247792	-2.11247	0.0346463	0.206494
gene7854	356.515	0.943369	0.172266	2.10934	0.0349151	0.20796
gene4387	7.39173	2.46607	0.894339	2.1089	0.0349535	0.208052
gene75	4.26975	-4.34551	1.78721	-2.10692	0.0351248	0.208935
gene9480	3.22675	-3.77818	1.51867	-2.10591	0.0352124	0.209319
gene1034	101.784	-1.57888	0.474412	-2.1055	0.0352474	0.209391
gene867	5.05681	-3.14671	1.22	-2.10385	0.0353914	0.209798
gene5816	4.42911	-2.99274	1.14664	-2.10418	0.0353628	0.209798
gene7710	508.895	1.11059	0.252167	2.10411	0.0353685	0.209798
gene9424	149.368	1.11756	0.255537	2.10366	0.0354081	0.209798
gene2576	29.0748	-1.79874	0.579506	-2.10306	0.0354605	0.209971
gene9401	8818.71	-1.033	0.215455	-2.10255	0.0355054	0.210101
gene4565	2279.06	1.07796	0.236881	2.10214	0.0355407	0.210173
gene10173	43.1509	1.70633	0.535917	2.10169	0.0355801	0.210269
gene6677	1258.59	-1.37075	0.376351	-2.1011	0.0356324	0.210441
gene6418	1695.82	1.10863	0.251733	2.09998	0.035731	0.210887
gene1227	3492.44	-0.992011	0.196349	-2.09836	0.0358733	0.21159
gene253	2807.31	1.21407	0.302485	2.09621	0.0360639	0.212576
gene9672	34.5203	-2.12403	0.738085	-2.09194	0.0364439	0.214677
gene8771	128.707	-1.14258	0.269176	-2.09002	0.0366163	0.215342
gene2769	694.531	-1.05372	0.226663	-2.08997	0.0366205	0.215342
gene10306	16.9265	2.00946	0.68399	2.08989	0.0366278	0.215342
gene434	28.8307	1.52531	0.452689	2.08822	0.0367782	0.216087
gene6159	125.885	1.19023	0.29232	2.08756	0.0368377	0.216297
gene7848	199.527	1.14718	0.271782	2.08689	0.0368977	0.216509
gene4175	4572.23	1.20654	0.300426	2.0855	0.0370239	0.21697
gene8556	128.836	1.38445	0.38571	2.08562	0.0370128	0.21697
gene4193	33.3441	-1.45949	0.422124	-2.08348	0.0372072	0.217904
gene5014	5.66686	-4.08141	1.68153	-2.08227	0.0373174	0.218409
gene8994	14.7629	-1.91942	0.643586	-2.08119	0.0374167	0.218849
gene3419	86.5555	1.1052	0.252629	2.07893	0.0376235	0.219917
gene8919	653.348	0.94969	0.177926	2.07777	0.0377303	0.2204
gene4946	894.878	-1.00849	0.206322	-2.07681	0.0378195	0.220779
gene9335	1053.91	1.67976	0.529692	2.07623	0.0378723	0.220946
gene2678	137.675	-1.40325	0.396859	-2.07441	0.038041	0.221788
gene6561	2.85074	-3.88325	1.59285	-2.0738	0.0380978	0.221977
gene10046	25.0114	1.6029	0.493351	2.07338	0.0381369	0.222063
gene2192	46.6308	-1.35117	0.372065	-2.07267	0.0382032	0.222306
gene2262	17.9544	-2.14483	0.755376	-2.07159	0.0383041	0.222751
gene7466	163.078	-1.21969	0.308911	-2.07079	0.0383788	0.223043
gene8074	3.02101	-4.02615	1.66479	-2.07001	0.038451	0.22332
gene3982	2439.18	-1.40434	0.398631	-2.06792	0.0386478	0.22432
gene8337	377.984	-1.25837	0.328256	-2.06658	0.0387741	0.224808
gene4239	489.315	1.49347	0.442036	2.0665	0.0387813	0.224808
gene8609	7.7763	-2.70333	1.02765	-2.0662	0.03881	0.224831
gene9418	46.9962	1.19075	0.295701	2.06542	0.0388837	0.224972
gene9712	33.5978	1.51025	0.450364	2.06556	0.0388699	0.224972
gene8724	47.2627	1.88341	0.632124	2.06196	0.0392117	0.226725
gene9211	26978.8	-1.03397	0.220197	-2.06164	0.0392425	0.226759
gene2903	5115.06	-1.05337	0.229658	-2.06121	0.0392829	0.226849
gene7696	3508.74	1.14797	0.275845	2.05902	0.039492	0.22777
gene6019	21.3922	1.53873	0.465627	2.05902	0.0394926	0.22777
gene6522	26.0589	1.57086	0.481786	2.05664	0.0397212	0.228944
gene3766	48.3619	1.49491	0.445336	2.05444	0.0399334	0.230021
gene67	2.61658	-4.04241	1.68658	-2.05292	0.0400805	0.230723
gene5313	447.129	1.07662	0.242003	2.05211	0.0401586	0.231026
gene4136	119.642	1.22795	0.315852	2.05145	0.0402235	0.231253
gene8091	73.6874	-1.25231	0.327919	-2.05023	0.0403421	0.231789
gene9137	1.90741	-4.69615	2.00904	-2.04881	0.0404806	0.232438
gene8953	55.9855	2.37386	0.876145	2.04744	0.0406144	0.233059
gene9048	44.1518	1.86251	0.626478	2.04717	0.0406418	0.233069
gene164	39.537	-1.53771	0.469387	-2.04034	0.0413163	0.236788
gene3417	2.65648	-4.02571	1.69068	-2.03806	0.0415438	0.237659
gene7717	617.089	1.16888	0.288913	2.03825	0.0415245	0.237659
gene341	31.1747	2.1753	0.782765	2.03803	0.0415467	0.237659
gene6214	2152.8	-1.54646	0.474325	-2.03754	0.0415959	0.237792
gene5646	34.1104	-1.28918	0.348258	-2.03635	0.041715	0.238024
gene647	1121.81	1.72338	0.561398	2.03666	0.0416839	0.238024
gene5392	26.1252	1.89043	0.643478	2.03648	0.0417017	0.238024
gene3913	711.651	1.09561	0.253283	2.03572	0.0417782	0.238235
gene10389	598.437	-1.41487	0.41047	-2.03393	0.0419588	0.239115
gene4292	695.655	1.27351	0.341182	2.03267	0.0420858	0.239689
gene372	851.566	1.09951	0.255679	2.03189	0.042165	0.23999
gene2204	12.1658	2.44693	0.91941	2.03057	0.0422986	0.240599
gene9372	6774.61	-1.13426	0.273133	-2.02929	0.0424292	0.240741
gene1121	70.3884	1.24501	0.327602	2.02994	0.0423625	0.240741
gene292	32.9981	1.37927	0.393864	2.02929	0.0424287	0.240741
gene8196	462.457	1.38346	0.395904	2.02944	0.0424135	0.240741
gene2969	232.875	-1.54142	0.474043	-2.02813	0.0425466	0.241256
gene2032	29.7356	1.78016	0.592165	2.02673	0.0426904	0.241921
gene4101	111.082	-1.0379	0.226036	-2.02576	0.042789	0.242329
gene2201	130.259	-1.12619	0.269802	-2.02442	0.0429274	0.242961
gene5456	5462.85	-0.955321	0.185481	-2.02349	0.0430223	0.243275
gene3782	2845.9	1.22583	0.319187	2.02336	0.0430363	0.243275
gene4350	1997.63	0.920866	0.168566	2.02215	0.043161	0.243829
gene7033	16.4816	2.12797	0.766214	2.02029	0.0433532	0.244763
gene1803	624.459	-1.21024	0.312063	-2.01961	0.0434242	0.245011
gene9533	265.874	1.27279	0.343172	2.01879	0.043509	0.245338
gene10083	4.49391	2.8697	1.13445	2.01833	0.0435566	0.245455
gene272	427.045	-0.932988	0.174949	-2.01767	0.043626	0.245693
gene5404	1233.05	1.25167	0.332981	2.01715	0.0436796	0.245843
gene1221	269.619	1.57157	0.491755	2.0164	0.0437586	0.246135
gene2170	171.212	-1.05594	0.236249	-2.01456	0.0439512	0.247066
gene1417	1148.22	1.35925	0.387073	2.01318	0.044096	0.247727
gene3266	89506	-1.28994	0.352728	-2.0127	0.0441458	0.247768
gene485	22283.4	-1.08157	0.249215	-2.01259	0.0441577	0.247768
gene4300	2.64553	-4.08431	1.74183	-2.01186	0.0442345	0.247893
gene5441	534.491	1.45879	0.436798	2.0119	0.0442303	0.247893
gene2270	1.76939	-4.45401	1.92817	-2.00917	0.0445196	0.249337
gene4893	9.08229	-3.05188	1.23163	-2.007	0.0447492	0.250377
gene3023	297.972	1.04042	0.22942	2.0069	0.0447603	0.250377
gene6760	137.484	-1.19499	0.306697	-2.0052	0.0449419	0.251239
gene3186	23.3197	1.65419	0.535846	2.00467	0.0449981	0.251398
gene3430	1259.44	2.99176	1.20354	2.00389	0.0450821	0.251713
gene7180	697.801	0.96132	0.190501	2.00168	0.0453196	0.252884
gene6453	33.4959	-1.63186	0.526216	-1.99891	0.0456176	0.254391
gene10045	237.683	1.10642	0.263528	1.99761	0.0457592	0.255024
gene7786	203.998	-1.00252	0.21159	-1.99688	0.0458378	0.255224
gene5347	1230.63	1.20888	0.314948	1.99676	0.0458511	0.255224
gene1685	8647.75	-1.88298	0.652854	-1.99583	0.0459526	0.255632
gene7978	36087.6	-1.0621	0.241734	-1.99435	0.0461141	0.256374
gene7815	250.889	1.3503	0.386757	1.99168	0.0464059	0.257839
gene1111	12.7023	-2.13298	0.779929	-1.99118	0.0464616	0.257991
gene9334	30.491	-1.53399	0.479219	-1.99073	0.0465111	0.258108
gene3767	47.4442	1.38841	0.406181	1.99026	0.0465622	0.258234
gene4378	443.072	-1.33632	0.380207	-1.98922	0.0466768	0.258712
gene6551	160.431	1.30197	0.363049	1.98863	0.0467424	0.258776
gene7675	135.183	1.35299	0.388709	1.9886	0.0467452	0.258776
gene4103	6.74874	2.56313	0.998109	1.98688	0.0469354	0.259671
gene7764	215.602	-1.39968	0.412639	-1.98643	0.0469858	0.259792
gene4931	2534.16	-1.02308	0.22316	-1.98548	0.0470908	0.260057
gene7685	404.476	1.01325	0.218205	1.98553	0.0470856	0.260057
gene1089	110.953	3.35125	1.3964	1.98456	0.0471929	0.260463
gene196	57.0345	-1.20416	0.314713	-1.98326	0.0473379	0.261104
gene5024	14832.2	1.00825	0.216039	1.98228	0.0474485	0.261556
gene10332	5.19629	-3.09879	1.2713	-1.98127	0.0475615	0.26202
gene6971	1119.74	-1.46487	0.446723	-1.98079	0.0476143	0.262091
gene10122	10.0435	2.14773	0.79153	1.98064	0.0476319	0.262091
gene484	43668.9	-1.04466	0.234647	-1.98025	0.0476757	0.262173
gene5410	6320.64	-0.919375	0.171427	-1.9797	0.0477368	0.262192
gene3493	621839	-0.875677	0.14935	-1.97976	0.0477302	0.262192
gene6375	153.779	1.23043	0.328737	1.97856	0.047865	0.262688
gene3683	24.7295	1.57649	0.503687	1.97839	0.0478847	0.262688
gene9730	2673.77	-1.38821	0.409046	-1.97585	0.0481717	0.264103
gene3094	54246.3	-2.29363	0.867759	-1.97478	0.0482933	0.26461
gene9955	229.643	1.17977	0.303798	1.97422	0.0483562	0.264795
gene8010	2637.44	-0.982541	0.203972	-1.9735	0.0484381	0.265084
gene2445	42655.3	-1.03203	0.229224	-1.972	0.0486099	0.265742
gene7217	22.6558	1.62288	0.528862	1.97194	0.0486167	0.265742
gene10184	3.5612	3.55869	1.51111	1.97119	0.0487022	0.26605
gene2893	39587.9	-1.0389	0.233003	-1.9695	0.0488957	0.266947
gene8540	53.8509	1.39893	0.415949	1.96882	0.0489734	0.26721
gene2056	10.6965	2.40211	0.926249	1.96719	0.0491608	0.267756
gene3811	4.9901	3.00486	1.23243	1.96755	0.0491199	0.267756
gene5516	2.20482	4.30239	1.89224	1.96719	0.0491616	0.267756
gene9301	4.07671	-3.29938	1.38304	-1.96623	0.0492725	0.268199
gene8559	1242.56	1.22702	0.329137	1.9658	0.0493216	0.268306
gene742	943.05	1.23281	0.332374	1.96408	0.0495203	0.269226
gene1877	147.135	-1.34447	0.389578	-1.9623	0.0497274	0.27019
gene1648	15866.5	-1.24807	0.340679	-1.96099	0.0498798	0.270755
gene10335	4988.95	-1.14583	0.288556	-1.9609	0.0498908	0.270755
gene10140	12.7729	-1.76992	0.60703	-1.96023	0.0499691	0.271011
gene6084	318.224	1.2289	0.331074	1.95999	0.0499975	0.271011
gene6219	46.4097	1.57287	0.506641	1.95971	0.0500294	0.271023
gene7654	291.638	1.40366	0.420353	1.95945	0.0500604	0.271029
gene6962	2532.19	1.25672	0.345461	1.9589	0.0501244	0.271214
gene5139	31.0475	-1.42913	0.433636	-1.95817	0.0502105	0.271519
gene8271	153.703	1.62513	0.534451	1.95552	0.0505217	0.273039
gene999	15620.6	-1.08997	0.26105	-1.95352	0.0507576	0.274151
gene6473	4.12434	-3.93647	1.72217	-1.94898	0.0512975	0.276903
gene1479	412.562	1.01266	0.222119	1.94787	0.0514305	0.277457
gene3878	2419.36	1.10008	0.267158	1.94671	0.0515701	0.277895
gene3297	46.7682	1.42012	0.431564	1.94668	0.0515728	0.277895
gene3477	384.494	-1.2325	0.335254	-1.94628	0.0516207	0.277988
gene7572	651.067	1.02117	0.226713	1.94592	0.0516642	0.278058
gene583	31.5439	1.40921	0.426277	1.94523	0.0517474	0.278341
gene3459	57.1446	2.03614	0.748996	1.94413	0.0518798	0.278888
gene8952	239.226	1.0482	0.240871	1.94379	0.0519204	0.278942
gene3389	540.981	-1.12603	0.280959	-1.94345	0.0519617	0.278999
gene8873	10.7206	2.06248	0.763552	1.94156	0.0521902	0.280061
gene6182	3006.41	-1.39659	0.42078	-1.94066	0.0523	0.280484
gene7084	552.438	1.06349	0.249312	1.9393	0.0524653	0.281205
gene7761	2947.14	1.12664	0.282107	1.93769	0.052661	0.282088
gene10383	6.10861	3.51974	1.51863	1.93578	0.0528941	0.28317
gene4364	186.638	1.05191	0.243897	1.93487	0.0530061	0.283603
gene9538	1094.25	2.33987	0.9097	1.93456	0.053044	0.283639
gene4790	7.42512	2.60662	1.04805	1.93372	0.053148	0.284028
gene3752	41.268	2.25209	0.86509	1.93285	0.0532553	0.284435
gene5057	4.30534	-3.91125	1.72584	-1.93022	0.0535797	0.285832
gene8945	414.549	3.45146	1.48746	1.93044	0.0535519	0.285832
gene9249	230.839	-0.937976	0.185758	-1.92712	0.0539653	0.28772
gene833	30.0828	-1.40004	0.425592	-1.92681	0.0540032	0.287754
gene620	800.913	-1.21309	0.328749	-1.92575	0.0541351	0.288288
gene7667	2014.1	1.20312	0.323915	1.92373	0.0543885	0.289468
gene3475	5.54844	-3.18361	1.35555	-1.92071	0.0547685	0.29098
gene2268	216.333	1.075	0.257678	1.92102	0.0547296	0.29098
gene9109	375.569	1.84408	0.658096	1.92081	0.0547561	0.29098
gene5679	229.994	-1.21765	0.332182	-1.9196	0.0549088	0.291555
gene7445	129.446	1.13336	0.28836	1.919	0.0549846	0.291787
gene3908	6.29537	2.46787	0.984856	1.9169	0.0552507	0.293028
gene3179	19497.4	-0.916804	0.175769	-1.91618	0.0553427	0.293345
gene6432	104.722	-1.13859	0.291587	-1.9157	0.0554035	0.293405
gene7556	1117.24	0.945383	0.190743	1.91558	0.0554185	0.293405
gene7242	286.722	1.25166	0.351091	1.91306	0.0557407	0.29494
gene6253	143.808	1.53088	0.497228	1.91236	0.0558299	0.29524
gene7009	24983.4	-0.952306	0.194869	-1.91054	0.0560631	0.296301
gene6874	13.7839	2.3748	0.940045	1.90927	0.0562273	0.296996
gene7186	56.1606	1.64832	0.559761	1.90853	0.0563221	0.297215
gene1675	2.44299	3.78156	1.67758	1.90844	0.056334	0.297215
gene8970	493.497	1.03225	0.237066	1.9077	0.0564305	0.297551
gene30	517.718	0.954911	0.196768	1.90534	0.0567353	0.298985
gene2634	6.9026	2.38203	0.946224	1.90444	0.0568528	0.299431
gene3705	123.253	-1.63539	0.55482	-1.90221	0.0571434	0.300788
gene4821	52.7011	1.42782	0.445828	1.90168	0.0572126	0.300978
gene10302	378.692	-1.05692	0.25095	-1.90046	0.0573723	0.301644
gene4580	9.34324	-1.97653	0.735426	-1.89894	0.0575727	0.301999
gene9726	132.439	-1.38607	0.424405	-1.89929	0.0575265	0.301999
gene2962	157.022	1.14854	0.299339	1.89933	0.0575211	0.301999
gene7597	1141.42	1.21049	0.33201	1.899	0.0575646	0.301999
gene3382	306.322	-1.28176	0.369639	-1.8985	0.0576302	0.302127
gene10231	40.5335	1.33234	0.396348	1.89818	0.0576722	0.302173
gene2276	2.04024	-4.06989	1.84244	-1.89417	0.0582022	0.304774
gene4347	269.632	0.935758	0.188	1.89233	0.0584468	0.305704
gene10157	312.037	1.83376	0.662531	1.89239	0.0584396	0.305704
gene3283	960.179	0.967805	0.205025	1.8915	0.0585577	0.305932
gene5526	2202.09	0.981895	0.212446	1.89175	0.0585243	0.305932
gene8613	44051.3	-0.963906	0.203219	-1.88912	0.0588752	0.307414
gene9788	2950.68	-1.12112	0.286513	-1.88863	0.0589416	0.307585
gene3407	242.969	-1.25714	0.358777	-1.88737	0.0591105	0.308289
gene10032	38.7438	1.35214	0.409262	1.88666	0.0592055	0.308608
gene597	67.6017	-1.14742	0.300839	-1.88612	0.0592793	0.308816
gene7011	552.3	1.05495	0.251868	1.8857	0.0593353	0.30893
gene9723	4.49511	-2.81774	1.18709	-1.88506	0.0594217	0.309204
gene747	2.1476	-3.83151	1.72641	-1.8834	0.059646	0.310193
gene2886	116.136	-1.34723	0.407523	-1.88267	0.0597445	0.310528
gene5611	738.118	0.877089	0.157873	1.88182	0.0598599	0.31095
gene3855	4.64457	2.65551	1.10307	1.88157	0.0598949	0.310955
gene46	4.0226	-3.24756	1.41825	-1.88089	0.0599874	0.311257
gene8445	11.7035	-1.88544	0.694223	-1.88043	0.0600489	0.311399
gene2151	804.855	-1.10715	0.28081	-1.87724	0.0604849	0.313481
gene3448	112.019	1.46889	0.473827	1.87598	0.060658	0.3142
gene10003	3.20786	-3.59644	1.60905	-1.87466	0.0608391	0.314783
gene8455	303.327	-1.10999	0.282711	-1.87466	0.0608398	0.314783
gene3996	151.328	-1.00331	0.225895	-1.87393	0.0609399	0.31481
gene6747	983.211	1.0741	0.263679	1.87387	0.0609489	0.31481
gene1326	1105.2	1.11947	0.28789	1.87389	0.0609462	0.31481
gene9231	4.09814	-2.5639	1.05985	-1.87187	0.0612251	0.316057
gene9507	19.1255	-2.36631	0.955207	-1.87008	0.0614732	0.316996
gene2011	2975.86	-1.09906	0.277565	-1.87005	0.0614766	0.316996
gene8264	177.994	1.44963	0.465146	1.86958	0.061542	0.317154
gene8114	2.33329	-4.0343	1.84862	-1.86858	0.0616807	0.317689
gene9666	786.567	-1.00858	0.22943	-1.86802	0.0617598	0.317916
gene7478	308.748	-1.00122	0.225537	-1.86761	0.0618167	0.318029
gene10348	1154.76	2.55187	1.05685	1.86579	0.0620704	0.319154
gene4163	2700.57	0.99518	0.222695	1.86434	0.0622742	0.320021
gene4683	774.084	-1.13309	0.297074	-1.86179	0.0626328	0.321501
gene6365	173.528	1.55186	0.522002	1.8618	0.0626318	0.321501
gene7172	372.953	3.14131	1.37647	1.86077	0.062776	0.322054
gene9134	107.081	1.08607	0.272358	1.85809	0.0631559	0.323821
gene9977	801.502	1.47712	0.483231	1.85651	0.0633807	0.32479
gene7138	207.779	-1.54095	0.517853	-1.85565	0.063504	0.325239
gene7406	158.922	2.5762	1.07735	1.85287	0.0639007	0.327087
gene416	130.808	-1.05727	0.25783	-1.85111	0.0641541	0.328199
gene5086	2.86288	-3.47481	1.56416	-1.85071	0.0642114	0.328308
gene1592	1455.3	-1.08035	0.27046	-1.85001	0.064312	0.328637
gene8616	2240.41	1.14086	0.303484	1.84807	0.0645917	0.329882
gene8962	5320.74	0.93209	0.190666	1.84664	0.0647996	0.330758
gene4993	1.76947	-4.6236	2.1932	-1.8437	0.0652268	0.332752
gene528	549.685	1.32103	0.402084	1.84297	0.0653334	0.333109
gene3607	9.73911	-2.23992	0.902196	-1.83987	0.0657876	0.335237
gene2502	48.8715	-2.31421	0.943205	-1.83864	0.0659681	0.335593
gene2472	41.7331	-1.82613	0.67774	-1.83866	0.0659649	0.335593
gene1932	275.493	-1.01211	0.234964	-1.83905	0.0659085	0.335593
gene6515	551.878	-1.03625	0.248378	-1.83691	0.0662234	0.336703
gene6358	1.9616	-4.18589	1.96457	-1.83546	0.0664381	0.337607
gene6823	84.2983	1.22905	0.354006	1.83344	0.0667376	0.338939
gene4478	1155.33	1.21578	0.346873	1.83289	0.0668188	0.339162
gene8242	412.252	-1.11957	0.294584	-1.83163	0.0670068	0.339888
gene3496	2019.49	1.37575	0.434498	1.83143	0.0670364	0.339888
gene6845	277.672	-1.00094	0.230131	-1.82914	0.067379	0.341434
gene5648	370.598	-1.20233	0.340543	-1.82745	0.0676321	0.342436
gene7620	499.414	-1.13661	0.304606	-1.82732	0.0676519	0.342436
gene9725	530.398	-1.77399	0.653666	-1.82661	0.0677587	0.342682
gene6524	3985.65	0.94521	0.199951	1.82649	0.0677759	0.342682
gene2501	3.21329	-3.76478	1.74445	-1.82567	0.0679	0.343062
gene923	138.345	1.10882	0.289684	1.82549	0.0679264	0.343062
gene570	31.5741	1.72174	0.62556	1.82514	0.0679796	0.34314
gene1125	21.5596	1.37643	0.436435	1.82485	0.0680232	0.34317
gene351	3.78416	-3.15719	1.41261	-1.82442	0.0680881	0.343307
gene3183	4821.43	-1.05917	0.2634	-1.81917	0.0688861	0.347123
gene8224	107.002	1.11852	0.296064	1.81894	0.0689211	0.347123
gene1295	1421.33	-1.17958	0.329773	-1.81815	0.0690418	0.347188
gene1543	680.077	-1.00183	0.232	-1.81823	0.0690283	0.347188
gene9399	59.6719	2.08873	0.829838	1.8181	0.0690485	0.347188
gene10166	318.679	0.95257	0.205309	1.81468	0.0695733	0.349634
gene8876	25.2587	-1.50555	0.510128	-1.81436	0.0696226	0.349688
gene2388	68.4155	1.43564	0.47233	1.81152	0.0700602	0.351692
gene9635	254.524	1.27383	0.383392	1.80972	0.0703385	0.352895
gene7837	1181.49	1.10086	0.287934	1.80897	0.0704558	0.353288
gene1754	662.818	1.28496	0.389942	1.80785	0.0706293	0.353963
gene2706	372.824	-1.01323	0.239798	-1.80663	0.0708196	0.354722
gene2618	283.149	-0.900349	0.177366	-1.80615	0.0708948	0.354903
gene2261	2.6003	3.27425	1.49214	1.80563	0.0709766	0.355117
gene2763	5421.44	0.975081	0.219132	1.80293	0.0713985	0.356836
gene5559	3291.64	1.04348	0.257066	1.80297	0.0713926	0.356836
gene2399	107.344	-1.14749	0.314994	-1.8016	0.0716087	0.357545
gene2488	61.8778	1.65731	0.597994	1.80153	0.0716191	0.357545
gene6556	344.308	-1.43013	0.472028	-1.80102	0.0716994	0.357554
gene4714	17.3919	3.03076	1.36063	1.80119	0.0716723	0.357554
gene9288	136.601	-1.09858	0.288273	-1.79893	0.0720304	0.359008
gene3470	71.3791	1.22442	0.358581	1.79715	0.0723114	0.360212
gene3064	235.075	1.15276	0.319056	1.79518	0.0726257	0.361579
gene2624	2.88485	-3.59245	1.67937	-1.7938	0.0728448	0.362235
gene10325	422.883	-1.0318	0.251894	-1.7936	0.0728769	0.362235
gene3153	533.769	0.906314	0.181887	1.79405	0.0728053	0.362235
gene6223	16.2801	1.58385	0.559766	1.79334	0.0729186	0.362244
gene9002	263.541	-1.03113	0.251616	-1.79294	0.072983	0.362367
gene9950	288.223	-1.03734	0.255122	-1.79263	0.0730314	0.362409
gene3562	7.57798	-2.37787	1.00313	-1.79226	0.0730913	0.362509
gene8088	41.2486	-1.34576	0.427407	-1.79164	0.0731906	0.362804
gene1739	1522.99	-1.59647	0.567452	-1.79128	0.0732482	0.362825
gene2085	507.854	-1.31693	0.411434	-1.79112	0.0732747	0.362825
gene6740	48.1668	-1.42496	0.471935	-1.79042	0.0733864	0.363181
gene9365	86.7564	1.10203	0.291691	1.78965	0.0735099	0.363594
gene3785	3808.42	0.986432	0.227187	1.78898	0.0736186	0.363934
gene3665	2.25846	-3.47659	1.62222	-1.78558	0.0741681	0.366452
gene7666	848.837	1.11002	0.297259	1.78302	0.0745823	0.368298
gene7590	21.0835	-1.46573	0.496965	-1.78227	0.074705	0.368704
gene7782	2.29562	3.68137	1.74226	1.78008	0.0750625	0.370267
gene1947	7786.99	-0.930412	0.197368	-1.77542	0.0758278	0.373638
gene6142	92.3922	1.10606	0.296293	1.77546	0.0758219	0.373638
gene2199	180.955	1.04048	0.259572	1.77401	0.0760618	0.374588
gene6464	26.1797	-1.4854	0.510565	-1.77333	0.0761742	0.374939
gene2920	38.3794	-1.44738	0.489575	-1.7717	0.0764451	0.376069
gene2133	3841.63	-1.22469	0.364639	-1.76803	0.077056	0.378869
gene6271	539.059	-0.965998	0.218358	-1.76773	0.0771059	0.37891
gene3184	8.22374	2.18929	0.911163	1.7662	0.0773629	0.379968
gene6554	617.055	-1.1503	0.323077	-1.76522	0.0775265	0.380566
gene2162	247.427	-0.923529	0.194661	-1.76476	0.0776047	0.380744
gene8706	423.486	1.32026	0.419562	1.76437	0.0776703	0.38086
gene10347	673.834	1.61094	0.585368	1.76119	0.0782068	0.383285
gene10300	33.2612	-1.31426	0.417602	-1.75828	0.0787003	0.385496
gene9819	2379.37	0.851013	0.154266	1.75679	0.0789529	0.386525
gene1248	711.658	-0.959083	0.215935	-1.75554	0.079167	0.387365
gene3015	26672.8	-0.963911	0.218806	-1.75457	0.0793326	0.387859
gene4730	6.95993	2.74634	1.23477	1.75445	0.0793532	0.387859
gene7257	15.544	2.6107	1.15769	1.7541	0.0794126	0.387941
gene1269	14190.6	0.969394	0.22217	1.75269	0.079656	0.388921
gene3915	74340.4	-0.991473	0.234939	-1.75141	0.0798758	0.389785
gene9025	6.97243	-2.08768	0.861138	-1.7508	0.0799807	0.390041
gene1449	1571.68	-0.976911	0.226737	-1.75054	0.0800258	0.390041
gene1140	19.4188	1.49317	0.521704	1.75036	0.0800567	0.390041
gene6560	147.486	-1.11675	0.306844	-1.74928	0.080243	0.39053
gene8148	26.5271	1.77035	0.68043	1.74941	0.0802203	0.39053
gene1271	287.364	-0.919934	0.194457	-1.74812	0.0804426	0.391293
gene9417	2091.75	0.846831	0.152718	1.74722	0.0806	0.391849
gene3150	4947.09	-1.05708	0.273134	-1.74668	0.0806929	0.392091
gene1879	190.038	-0.949825	0.211814	-1.74599	0.0808124	0.392462
gene2672	4511.08	-1.09611	0.295805	-1.74476	0.0810258	0.393288
gene1624	9934.45	-0.990733	0.235476	-1.74426	0.081113	0.393502
gene5018	2.26464	-3.74034	1.81337	-1.7428	0.0813685	0.394531
gene9783	400.022	1.34284	0.437853	1.74222	0.0814695	0.39481
gene4080	1449.89	1.02888	0.257845	1.7409	0.0817017	0.395725
gene6350	2191.53	1.03388	0.261112	1.73827	0.0821628	0.397747
gene9127	3.42399	-3.6706	1.78003	-1.73626	0.0825178	0.398829
gene2754	1557.47	-1.06505	0.279364	-1.73627	0.0825154	0.398829
gene6066	3.80658	3.00919	1.39903	1.73634	0.082503	0.398829
gene8282	2.46233	-3.45044	1.65495	-1.73446	0.0828368	0.399946
gene5786	91.0822	1.99168	0.813804	1.73467	0.0828001	0.399946
gene4	228.851	2.40652	1.05323	1.7342	0.0828819	0.399951
gene3164	148.381	-1.38994	0.467489	-1.73253	0.0831799	0.401177
gene790	478.681	0.903312	0.186769	1.73108	0.0834378	0.402207
gene1416	4.53108	2.69718	1.2244	1.72915	0.0837814	0.40365
gene7286	1209.32	-0.882342	0.174932	-1.72834	0.0839271	0.403842
gene2374	809.697	0.927692	0.20119	1.72818	0.0839563	0.403842
gene1679	13431.8	0.943098	0.210079	1.72839	0.0839191	0.403842
gene7441	3.13329	2.93789	1.36457	1.72794	0.0839988	0.403842
gene1109	1392.92	0.919036	0.196334	1.72683	0.0841987	0.404184
gene1211	381.913	1.05574	0.275506	1.7268	0.0842032	0.404184
gene25	515.702	1.21899	0.369969	1.72715	0.0841411	0.404184
gene3290	892.872	-1.37079	0.458419	-1.72503	0.0845212	0.405042
gene4327	89.2899	-1.1062	0.305012	-1.72518	0.0844944	0.405042
gene5090	2077.42	-0.906178	0.189099	-1.7249	0.0845451	0.405042
gene6781	113.866	1.10797	0.306104	1.72482	0.0845599	0.405042
gene8866	1233.75	-0.980458	0.232253	-1.72423	0.0846655	0.405334
gene9481	574.777	-1.13107	0.320019	-1.72197	0.0850741	0.40706
gene7097	3454.26	1.02321	0.25742	1.72175	0.0851154	0.40706
gene9782	2361.18	-0.923651	0.19994	-1.71877	0.0856559	0.409215
gene7544	6388.23	1.20149	0.361557	1.71893	0.0856265	0.409215
gene3182	20964.9	-1.33274	0.439096	-1.7143	0.0864744	0.412476
gene587	52.8643	-1.19628	0.359458	-1.71448	0.0864412	0.412476
gene1622	34.8229	1.53491	0.556958	1.7145	0.0864361	0.412476
gene6445	8.25327	-1.87639	0.757149	-1.7122	0.0868591	0.414094
gene2823	57.4824	1.53377	0.557247	1.71157	0.0869753	0.414214
gene7803	11.7531	2.31741	1.01508	1.7116	0.0869709	0.414214
gene9729	93.2471	-1.89228	0.767133	-1.71063	0.0871486	0.414822
gene6996	2.26876	-3.21423	1.54156	-1.70881	0.0874863	0.416164
gene3925	267.565	-0.974808	0.231069	-1.70862	0.0875219	0.416164
gene2755	17.5172	-1.62975	0.615828	-1.70462	0.0882654	0.419261
gene1840	288.363	-1.33674	0.443896	-1.70476	0.0882398	0.419261
gene4797	47.5959	1.68109	0.646175	1.704	0.0883802	0.419587
gene8526	26.729	1.31667	0.432479	1.70337	0.0884994	0.419934
gene9861	2395.16	0.9864	0.23908	1.69985	0.0891598	0.422627
gene5656	455.1	1.25888	0.399377	1.69986	0.0891574	0.422627
gene9991	470.754	1.12562	0.321061	1.69944	0.0892357	0.422766
gene6117	219.012	1.59887	0.6004	1.69698	0.0897003	0.424746
gene5730	2.36115	-3.68556	1.83082	-1.69626	0.0898359	0.425167
gene9643	42.1801	-1.36669	0.464028	-1.69535	0.0900097	0.425768
gene9202	13.8116	-1.58039	0.590427	-1.69435	0.0901985	0.42644
gene976	176.202	0.919098	0.200262	1.69327	0.0904033	0.427186
gene1677	297.75	-1.16061	0.342965	-1.69291	0.0904727	0.427292
gene9916	5875.79	0.778327	0.117181	1.69248	0.0905536	0.427453
gene6985	8.41997	-1.83022	0.73894	-1.69191	0.0906623	0.427744
gene950	13482.3	-0.912584	0.196704	-1.69078	0.0908788	0.428543
gene7240	13.6965	-1.64776	0.631753	-1.69016	0.0909969	0.428878
gene8252	2.802	-3.77233	1.8919	-1.68737	0.0915332	0.431182
gene5890	40.6413	1.34462	0.453303	1.68678	0.0916465	0.431493
gene6491	23.6172	1.79829	0.722596	1.68599	0.0917971	0.431978
gene466	37073.3	-0.917062	0.200464	-1.68141	0.0926834	0.435846
gene5665	525.055	1.31411	0.436647	1.68125	0.0927149	0.435846
gene1582	55115.8	-0.982426	0.239482	-1.68041	0.0928783	0.436389
gene8652	2.49469	3.91496	1.98521	1.6799	0.0929768	0.436626
gene3722	1.99272	-3.4427	1.708	-1.67605	0.093729	0.439932
gene52	2.24378	-3.29405	1.62045	-1.67487	0.0939588	0.440667
gene8008	4715.34	1.05063	0.281012	1.67475	0.0939825	0.440667
gene7901	740.411	1.12736	0.327062	1.67357	0.0942144	0.441527
gene9071	643.125	-1.13684	0.332783	-1.6733	0.0942687	0.441554
gene9655	44701.5	-0.944913	0.218335	-1.67135	0.0946534	0.443128
gene9298	20.0425	1.94325	0.81582	1.67101	0.094719	0.443207
gene4856	1056.62	-1.61372	0.619265	-1.66927	0.0950633	0.444589
gene4895	200.757	-1.98601	0.843607	-1.66667	0.09558	0.445999
gene9283	68.4136	-1.18801	0.364839	-1.66652	0.0956098	0.445999
gene10059	15400.4	0.778265	0.118929	1.66709	0.095497	0.445999
gene5502	121.887	1.41754	0.502475	1.66684	0.0955467	0.445999
gene4910	610.206	2.49188	1.14673	1.66724	0.095466	0.445999
gene4184	1.85086	-3.3014	1.63524	-1.66422	0.0960687	0.447681
gene9196	11.1355	-1.9413	0.81789	-1.66441	0.0960304	0.447681
gene5651	3191.67	-0.945564	0.219713	-1.66382	0.0961481	0.447822
gene9295	13.1355	1.83312	0.753857	1.66228	0.0964572	0.449032
gene3999	329.586	1.04015	0.277057	1.66086	0.096742	0.450127
gene9278	96.4456	1.13191	0.332424	1.66025	0.0968646	0.450467
gene6369	41799.3	-0.897648	0.191412	-1.6595	0.0970152	0.450937
gene2921	7.6843	-2.4362	1.11961	-1.6579	0.0973375	0.452204
gene8070	76.1398	1.02595	0.269045	1.65754	0.0974101	0.452311
gene2102	23754.9	-0.93849	0.216636	-1.65481	0.097964	0.454419
gene9853	115.741	1.1234	0.328346	1.65496	0.0979318	0.454419
gene7902	936.587	1.03714	0.276346	1.65422	0.0980834	0.454741
gene7611	270.547	-0.993895	0.250352	-1.65325	0.0982792	0.455417
gene1205	874.043	0.93464	0.214555	1.65291	0.0983492	0.45551
gene8961	341.605	-1.22886	0.392781	-1.65196	0.0985421	0.456171
gene7861	9.44078	-1.75277	0.710167	-1.6514	0.0986563	0.456344
gene2776	595.15	-0.92915	0.211473	-1.65104	0.09873	0.456344
gene3818	860.38	0.894427	0.190438	1.65107	0.0987237	0.456344
gene8191	391.441	-1.76338	0.717056	-1.65032	0.0988765	0.456789
gene8170	115.234	-1.09736	0.313549	-1.65	0.0989421	0.45686
gene3154	41.3105	1.38893	0.490495	1.64922	0.0991026	0.457369
gene6205	3.98222	2.52237	1.17803	1.64882	0.0991836	0.457511
gene3456	608.374	-1.32841	0.454157	-1.64792	0.0993697	0.458138
gene5726	1035.43	1.29686	0.43525	1.64701	0.0995559	0.458403
gene9850	23.3015	1.65772	0.654395	1.6469	0.0995783	0.458403
gene7432	1.81452	3.29562	1.64861	1.64722	0.0995123	0.458403
gene3638	19.6144	2.13675	0.94595	1.6457	0.099825	0.459306
gene5362	12.9351	-1.57868	0.607111	-1.64497	0.0999766	0.459587
gene4431	1469.53	1.19622	0.374621	1.64492	0.099987	0.459587
gene3445	2161.79	1.03032	0.273849	1.64442	0.10009	0.459826
gene6145	1945.66	-1.13948	0.340394	-1.64363	0.100253	0.460346
gene9102	3188.8	-1.2869	0.430767	-1.64103	0.100791	0.462583
gene4359	1144.14	-1.04103	0.281196	-1.63953	0.101103	0.463781
gene3576	452.049	-1.35957	0.475816	-1.63838	0.101343	0.464481
gene6731	44.5527	2.14546	0.955533	1.63831	0.101358	0.464481
gene5007	4.30491	-3.05644	1.51226	-1.63757	0.10151	0.464945
gene1287	157.875	1.51064	0.568921	1.63581	0.10188	0.466403
gene9166	315.087	1.16726	0.359097	1.63539	0.101968	0.46657
gene9230	90.0464	-1.3079	0.445186	-1.63505	0.102038	0.466659
gene148	2296.9	-0.932234	0.215495	-1.63454	0.102147	0.466912
gene543	475.505	1.21259	0.38713	1.63405	0.102248	0.466912
gene600	203.367	2.51136	1.18189	1.63412	0.102233	0.466912
gene2363	659.275	1.08071	0.306837	1.63184	0.102712	0.468799
gene4324	17.0071	-1.9106	0.815616	-1.63141	0.102804	0.468983
gene6341	3130.43	-1.22027	0.392654	-1.63063	0.102968	0.469497
gene8567	1819.8	1.02443	0.27259	1.63038	0.103022	0.469506
gene7059	17.728	-1.46994	0.546067	-1.62972	0.10316	0.469899
[truncated: 7,471 more rows]
